1 ***C9orf72*-associated arginine-rich dipeptide repeats induce RNA-**  
2 **dependent accumulation of Staufen in nucleus**

3  
4 Eun Seon Kim<sup>1,☉</sup>, Chang Geon Chung<sup>1,☉</sup>, Yoon Ha Kim<sup>1</sup>, In Jun Cha<sup>1</sup>, Jeong Hyang Park<sup>1</sup>,  
5 Jaekwang Kim<sup>2</sup>, Chang Man Ha<sup>3</sup>, Hyung-Jun Kim<sup>2</sup>, Sung Bae Lee<sup>1,\*</sup>

6  
7  
8  
9  
10 <sup>1</sup>Department of Brain & Cognitive Sciences, DGIST, Daegu, 42988, Republic of Korea

11 <sup>2</sup>Dementia research group, Korea Brain Research Institute (KBRI), Daegu, 41068, Republic of

12 Korea <sup>3</sup>Research Division and Brain Research Core Facilities of Korea Brain Research Institute  
13 (KBRI), Daegu, 41068, Republic of Korea

14  
15 ☉These authors contributed equally to this work.

16 \* [sblee@dgist.ac.kr](mailto:sblee@dgist.ac.kr)

## 24 **Abstract**

25 Accumulation of RNA in the nucleus is one of the pathological features of *C9orf72*-associated  
26 amyotrophic lateral sclerosis and frontotemporal dementia (C9-ALS/FTD), yet its potential  
27 toxic cellular consequences remain largely undefined. RNA accumulated in the nucleus may  
28 interact with and increase nuclear localization of RNA-binding proteins (RBPs). Here, we show  
29 in C9-ALS/FTD *Drosophila melanogaster* model that Staufen, a double-stranded RBP  
30 normally localized in cytoplasm, accumulates in the nucleus, which is in contrast to many  
31 nuclear-localized RBPs, such as TDP-43 and FUS, whose cytoplasmic accumulation is thought  
32 to be a pathological hallmark of ALS/FTD. We found that in *Drosophila* neurons expressing  
33 arginine-rich dipeptide repeat proteins (DPRs), Staufen accumulated in the nucleus in an RNA-  
34 dependent manner. In the nucleus, Staufen localized closely to, and potentially interacts with,  
35 heterochromatin and nucleolus in *Drosophila* C4 da neurons expressing poly(PR), a proline-  
36 arginine (PR) DPR. PR toxicity in C4 da neurons increased Fibrillar staining in the nucleolus,  
37 which was enhanced by *stau* heterozygous mutation. Furthermore, knockdown of *fib*  
38 exacerbated retinal degeneration mediated by PR toxicity, which suggests that increased  
39 amount of Fibrillar by *stau* heterozygous mutation is protective. Heterozygotic mutation of  
40 *stau* could also mitigate retinal degeneration and rescue viability of flies exhibiting PR toxicity.  
41 Taken together, our data show that nuclear accumulation of cytoplasmic protein, such as  
42 Staufen, may also be an important pathological feature of C9-ALS/FTD.

43

44

45

46

47

## 48 **Author summary**

49 Cytoplasmic accumulation of nuclear RNA-binding proteins (RBPs) is one of the common  
50 pathological features of amyotrophic lateral sclerosis (ALS) and frontotemporal dementia  
51 (FTD). In *C9orf72*-associated ALS/FTD fly model, we found that Staufen, a double-stranded  
52 (ds) RBP normally localized mostly in cytoplasm, accumulates in the nucleus in an RNA-  
53 dependent manner. Next, we checked wherein the nucleus Staufen accumulates and found that  
54 Staufen partially co-localizes with heterochromatin and nucleolus. Interestingly, the expression  
55 of Fibrillarin, a nucleolar protein, was significantly increased by *C9orf72*-derived PR toxicity  
56 and further augmented by reduction in *stau* dosage, the gene encoding Staufen. When we  
57 knocked down *fib*, the gene encoding Fibrillarin, PR-induced retinal degeneration was  
58 exacerbated. This indicates that increased Fibrillarin expression by *stau* dosage reduction is  
59 protective. Furthermore, when we reduced *stau* dosage in flies presenting PR toxicity, their  
60 retinal degeneration and viability were largely rescued. Based on these data, we suggest that  
61 nuclear accumulation of Staufen is an important feature of C9-ALS/FTD and suggest that  
62 reducing *stau* dosage is a promising therapeutic target.

63

64

65

66

67

68

69

70

71

## 72 **Introduction**

73 Amyotrophic lateral sclerosis (ALS) and frontotemporal dementia (FTD) are two diseases on  
74 a single pathogenic spectrum with overlapping genetic etiologies [1]. GGGGCC (G<sub>4</sub>C<sub>2</sub>) repeat  
75 expansion mutation in the intron of *C9orf72* is the most common cause of both familial and  
76 sporadic cases of ALS and FTD (C9-ALS/FTD) [2, 3]. G<sub>4</sub>C<sub>2</sub> repeat expansion produces both  
77 sense (G<sub>4</sub>C<sub>2</sub>) and antisense (G<sub>2</sub>C<sub>4</sub>) RNAs that can either form toxic nuclear foci [4, 5] or  
78 undergo repeat-associated non-ATG translation (RANT) in the cytoplasm to generate five  
79 types of dipeptide repeat proteins (DPRs) [6, 7]: glycine-alanine (GA), glycine-proline (GP),  
80 glycine-arginine (GR), proline-arginine (PR), and proline-alanine (PA). Among them,  
81 arginine-rich DPRs have been shown to be most toxic in fly and mammalian models for ALS  
82 [8].

83 In recent years, nucleocytoplasmic transport defect, which includes decreases in  
84 protein import into and mRNA export from the nucleus, has been identified as one of the  
85 prominent pathogenic features of C9-ALS/FTD [9-12], leading to accumulation of proteins in  
86 the cytoplasm and mRNA in the nucleus, respectively. In addition, recent studies showed  
87 nuclear accumulation of double-stranded RNA (dsRNA) in *tdp-1*-deleted *C. elegans* [13] and  
88 in PR-expressing mouse cortical neurons [14]. Currently, potentially toxic consequences of  
89 decreased protein import are actively being explored, one of which is cytoplasmic mis-  
90 localization of TDP-43 [15], a pathological hallmark of ALS/FTD [16]. However, potentially  
91 toxic consequences of RNA accumulation in the nucleus remain largely underexplored.

92 RNA-binding proteins (RBPs) such as hnRNPA1 have been shown to egress out of the  
93 nucleus to the cytoplasm when there is a decreased level of nuclear RNA [17, 18]. These studies  
94 lead to a hypothesis that increased RNA levels in the nucleus might induce nuclear retention  
95 of certain RBPs, resulting in their subsequent gain of nuclear toxicity in ALS. Thus, to test our  
96 hypothesis, we used C9-ALS/FTD *Drosophila* model system to screen for and identify RBPs

97 whose nuclear accumulation leads to neurotoxicity and to understand its underlying  
98 mechanisms.

99

100

101

102

103

104

105

106

107

108

109

110

111

112

113

114

115

116

117

118

119

120

121

122

## 123 **Results**

### 124 **Arginine-rich DPR proteins increase nuclear accumulation of Staufen in neurons**

125 To identify potential RNA-binding proteins (RBPs) that show increased nuclear localization in  
126 C9-ALS/FTD *Drosophila* model, we screened in C4 da neurons, which was recently used to  
127 model ALS in flies [19], for RBPs whose accumulation in the nucleus was increased compared  
128 to the controls. For the screen, we used as C9-ALS/FTD *Drosophila* model the flies that  
129 expressed PR repeat proteins (V5-PR36) and not GR repeat proteins, because recent studies  
130 showed that between the two arginine-rich DPRs, PR is more closely associated with  
131 nucleocytoplasmic transport defects [10, 20, 21]. In addition, by using V5-PR36, which is  
132 expressed from an alternative codon different from repeated G<sub>4</sub>C<sub>2</sub> sequence, we were able to  
133 preclude detection of RBPs mis-localized by G<sub>4</sub>C<sub>2</sub> RNA from the screen.

134 The genetic screen identified Staufen as the RBP whose accumulation in the nucleus  
135 increased most significantly. In control (CTRL) C4 da neurons, GFP-tagged Staufen showed  
136 mostly cytoplasmic localization with small puncta in the nucleus, whereas in C4 da neurons  
137 expressing V5-PR36, GFP-Staufen puncta were much more prominent in the nucleus (Fig 1A).  
138 We then quantitatively measured the mean intensity (y-axis) and counted pixel numbers (x-  
139 axis) for nuclear GFP-Staufen puncta in controls and in C4 da neurons expressing V5-PR36  
140 and plotted their relative values (Fig 1B). V5-PR36-expressing C4 da neurons showed puncta  
141 with substantially higher mean fluorescence intensity (i.e. higher density) and pixel number  
142 (i.e. larger size) compared to those in controls. To estimate relative amount of GFP-Staufen  
143 proteins in the nucleus of neurons with or without V5-PR36 expression, we multiplied the mean  
144 fluorescence intensity with the pixel number of GFP-Staufen puncta. C4 da neurons expressing  
145 V5-PR36 showed significantly ( $p = 0.0022$ ) higher amount of Staufen proteins in the nucleus  
146 compared to the controls (Fig 1C).

147 To investigate whether nuclear accumulation of Staufen is specific to V5-PR36  
148 expression, we examined in C4 da neurons the localization pattern of GFP-Staufen after  
149 expressing other C9-ALS/FTD constructs: G<sub>4</sub>C<sub>2</sub>36, G<sub>4</sub>C<sub>2</sub>36-RNA only, Myc-PA36, and HA-  
150 GR36. Among them, G<sub>4</sub>C<sub>2</sub>36 and HA-GR36 expression led to increased nuclear accumulation  
151 of Staufen (S1A-C Fig), whereas G<sub>4</sub>C<sub>2</sub>36-RNA only and Myc-PA36 expression did not. These  
152 results suggest that only the constructs that produce arginine-rich DPRs (i.e. G<sub>4</sub>C<sub>2</sub>36, V5-PR36,  
153 and HA-GR36), but not the others (i.e. G<sub>4</sub>C<sub>2</sub>36-RNA only and Myc-PA36), induce nuclear  
154 accumulation of Staufen. Next, we questioned whether V5-PR36 expression can increase  
155 nuclear accumulation of Staufen in other neuron types. To this end, we expressed V5-PR36 in  
156 motor neurons as well as in the entire central nervous system using *D42-gal4* and *elavGS-gal4*  
157 drivers, respectively. Consistent with our results from C4 da neurons, expression of V5-PR36  
158 in other neuron types in *Drosophila* brains showed an increase in nuclear accumulation of  
159 Staufen (Fig 1D and 1E), compared to controls. These data collectively suggest that arginine-  
160 rich DPRs induce nuclear accumulation of Staufen in *Drosophila* neurons.

161

### 162 **Nuclear-accumulated Staufen partially co-localizes with heterochromatin in PR36-** 163 **expressing neurons**

164 A recent study reported that PR repeat proteins co-localize with heterochromatin and disrupt  
165 heterochromatin protein 1 $\alpha$  (HP1 $\alpha$ ) liquid droplets [14]. This disruption in mouse cortical  
166 neurons expressing PR repeat proteins leads to mis-expression of repetitive elements (RE) that  
167 form dsRNA, which accumulates within the nucleus [14]. We hypothesized based on this  
168 previous study that Staufen, which is a dsRNA-binding protein (dsRBP), may be recruited to  
169 the heterochromatin region, a site of dsRNA production, in neurons presenting PR36 toxicity.  
170 To test this hypothesis, we expressed RFP-tagged HP1, a *Drosophila* ortholog of HP1 $\alpha$ , and  
171 compared its co-localization pattern with GFP-Staufen with or without PR36 expression in C4

172 da neurons (Fig 2A and 2B). C4 da neurons with PR36 expression showed that greater fraction  
173 of HP1 puncta co-localized with GFP-Staufen puncta than in controls ( $p = 0.0339$ ) (Fig 2C).  
174 Consistently, GFP-Staufen partially co-localized with 4', 6-diamidino-2-phenylindole (DAPI),  
175 which labels heterochromatin, in C4 da neurons expressing V5-PR36 (Fig 2D and E). These  
176 data suggest that PR toxicity can augment heterochromatin distribution of Staufen in  
177 *Drosophila* neurons.

178         Next, we asked how PR toxicity might induce nuclear accumulation of dsRNA in C4  
179 da neurons. Recent studies showed that loss of nuclear TDP-43, a prominent pathological  
180 feature of C9-ALS/FTD [22], can derepress RE transcription from heterochromatin [13, 23,  
181 24], leading to accumulation of dsRNA in the nucleus. Thus we tested whether decreasing the  
182 amount of nuclear TBPH, a *Drosophila* ortholog of TDP-43, is sufficient to increase  
183 accumulation of Staufen in the nucleus. To this end, we knocked down *TBPH* and examined  
184 the localization pattern of Staufen in the nucleus of C4 da neurons (S2A Fig). Compared to the  
185 controls, *TBPH* RNAi led to increased accumulation of Staufen in the nucleus of C4 da neurons  
186 (S2B-D Fig). These data suggest that PR toxicity might increase nuclear accumulation of  
187 Staufen through reducing nuclear TBPH.

188

### 189 **Increased nuclear accumulation of Staufen by PR toxicity is RNA-dependent**

190 It is possible that Staufen can accumulate in the nucleus by its binding to RNAs, such as  
191 dsRNA. To test whether PR-induced nuclear accumulation of Staufen is dependent on RNA,  
192 we dissected larvae with V5-PR36 expression in C4 da neurons and treated them with RNase  
193 A for 1hr at 37 °C before fixing them for imaging analysis. The RNase A treatment protocol  
194 we used effectively reduced RNA levels in C4 da neurons (S3A and S3B Fig). Reducing RNA  
195 levels led to a substantial decrease in the V5-PR36-induced nuclear accumulation of Staufen  
196 (Fig 3A). We then measured the mean intensity (y-axis) and counted pixel numbers (x-axis) of



197 nuclear GFP-Staufen puncta in C4 da neurons expressing V5-PR36 with or without RNase A  
198 treatment and plotted their relative values (Fig 3B). RNase A treatment led to decreases in  
199 density and size of GFP-Staufen puncta. Relative amount of GFP-Staufen proteins in the  
200 nucleus was calculated by multiplying the mean fluorescence intensity with the pixel number  
201 of GFP-Staufen puncta. RNase A-treated C4 da neurons expressing V5-PR36 exhibited  
202 significantly ( $p = 0.0334$ ) lower amount of GFP-Staufen proteins in the nucleus compared to  
203 the controls (Fig 3C). These results suggest that increased accumulation of Staufen in the  
204 nucleus by PR toxicity is RNA-dependent.

205

206 **Increased nucleolar expression of Fibrillarin by reduced *stau* dosage is a compensatory**  
207 **response to PR toxicity in *Drosophila***

208 A large portion of heterochromatin, which consists of inactive ribosomal DNA (rDNA),  
209 decorates the outer region of the nucleolus within which actively transcribed rDNA are situated  
210 [25]. In addition, previous studies have shown that Staufen can localize to the nucleolus [26-  
211 28], the dysfunction of which has been reported in C9-ALS/FTD models and patients [29].  
212 These data suggest a possibility that in addition to the heterochromatin, PR toxicity may also  
213 induce Staufen to accumulate in or influence the activity of the nucleolus. To test this  
214 possibility, we expressed V5-PR36 and GFP-Staufen in C4 da neurons and immunostained for  
215 Fibrillarin, which is localized in the dense fibrillar component of the nucleolus [30]. GFP-  
216 Staufen and Fibrillarin overlapped only in the fringes (S4A and S4B Fig), but interestingly, we  
217 noticed that Fibrillarin staining was considerably stronger ( $p = 0.0195$ ) in C4 da neurons  
218 expressing V5-PR36 than in controls (S5A and S5B Fig). This is consistent with a previous  
219 report showing increased nucleolar size determined by Fibrillarin staining in U2OS and NSC-  
220 34 cells expressing PR20 [31].

221 Although Staufen and Fibrillarin overlapped only in the fringes, abnormal

222 accumulation of Staufen in the nucleus may still contribute to the increased staining of  
223 Fibrillarin in C4 da neurons expressing V5-PR36. To test this possibility, we examined the  
224 amount of Fibrillarin upon V5-PR36 expression in flies with heterozygous mutation (*stau*<sup>9/+</sup>)  
225 for the gene encoding Staufen (*stau*) and compared it to the controls. Surprisingly,  
226 heterozygous loss of *stau* actually increased (p = 0.0371) nucleolar staining of Fibrillarin in C4  
227 da neurons expressing V5-PR36 (Fig 4A and 4B). Of note, about 15.6% (5/32) of those neurons  
228 showed more than 3.5-fold increase in nucleolar staining of Fibrillarin compared to V5-PR36  
229 only controls. Increased level of Fibrillarin in the nucleolus may be either a toxic feature of or  
230 a compensatory response to PR toxicity. To test which is the case, we decreased the level of  
231 Fibrillarin by knockdown of the gene encoding Fibrillarin (*Fib*) in *Drosophila* eyes using  
232 *GMR-gal4* and examined whether PR36-induced retinal degeneration was exacerbated or  
233 mitigated. Knockdown of *Fib* exacerbated the PR36-induced retinal degeneration, whereas the  
234 knockdown by itself showed no toxicity (Fig 4C). Interestingly, a previous study showed that  
235 knockdown of *Fib* can also exacerbate GR-induced retinal degeneration in *Drosophila* [32].  
236 These data suggest that a partial loss of *stau* increases the level of Fibrillarin, which may be a  
237 compensatory response to, and not a toxic feature of, PR toxicity.

238

### 239 **Heterozygous loss of *stau* rescues PR toxicity in *Drosophila***

240 We showed above that in neurons expressing V5-PR36, Staufen partially overlaps with  
241 Fibrillarin in the nucleolus and that reducing the dosage of *stau* increases the amount of  
242 Fibrillarin, which may be a compensatory response to PR toxicity. If this is the case, we  
243 hypothesized that reducing *stau* gene dosage might mitigate PR toxicity. To test this hypothesis,  
244 we expressed PR36 in the *Drosophila* eyes via *GMR-gal4* and compared their external  
245 morphologies to the controls. By four days after eclosion, flies expressing PR36 displayed a  
246 considerable retinal degeneration with loss of pigments and gain of necrotic spots (Fig 5A).

247 Consistent with our hypothesis, *stau* heterozygous mutation was able to suppress PR36-  
248 induced retinal degeneration (Fig 5A).

249 Next, we asked whether *stau* heterozygous mutation could increase viability of flies  
250 expressing V5-PR36. We measured the percentage of larvae (Genotypes. *stau*<sup>+/-</sup>: *stau*<sup>ry9/+</sup>; *elav-*  
251 *gal4/+*, *V5-PR36*: +/+; *elav-gal4/UAS-V5-PR36*, *stau*<sup>+/-</sup> + *V5-PR36*: *stau*<sup>ry9/+</sup>; *elav-gal4/UAS-*  
252 *V5-PR36*) reaching the pupal and adult stages and compared them with one another. Most of  
253 the *stau*<sup>+/-</sup> larvae reached the pupal (86.46%) and adult (75.14%) stages, whereas only 42.97%  
254 and 14.98% of *V5-PR36* larvae reached the pupal and adult stages, respectively (p = 0.0022)  
255 (Fig 5B and 5C). Remarkably, the larva-to-pupa (72.92%) and larva-to-adult (56.95%; p =  
256 0.0131) viabilities were largely rescued in *stau*<sup>+/-</sup> + *V5-PR36* larvae (Fig 5B and 5C). Taken  
257 together, these results suggest that PR toxicity induces aberrant accumulation of Staufen in the  
258 nucleus and that reducing the *stau* gene dosage is sufficient to rescue PR toxicity in  
259 *Drosophila*.

260

261

262

263

264

265

266

267

268

269

270

## 271 **Discussion**

272 Most ALS/FTD pathology can be defined by nuclear loss and cytoplasmic accumulation of  
273 disease-associated proteins, such as TDP-43, FUS, TAF15, EWSR1, hnRNPA1, or  
274 hnRNPA2/B1, thereby leading to their loss of nuclear function and gain of toxic cytoplasmic  
275 function [33]. On the other hand, to our knowledge, no cytoplasmic protein has been identified  
276 thus far in ALS/FTD that translocate into the nucleus and accumulate therein. In this study, we  
277 identified Staufen, a cytoplasmic dsRBP, as a potential disease-associated protein in C9-  
278 ALS/FTD *Drosophila* model that exhibits increased accumulation in the nucleus. We found  
279 that, inside the nucleus, Staufen partially interacted with heterochromatin and nucleolus in an  
280 RNA-dependent manner. Reducing the dosage of *stau* mitigated retinal degeneration in flies  
281 expressing V5-PR36 and rescued their viability.

282         Among the RBPs screened in this study, only Staufen was identified as a dsRBP. This  
283 is a significant point, because what most distinguishes Staufen from other RBPs screened is its  
284 ability to bind to dsRNA [34], a toxic byproduct of disrupted heterochromatin caused by PR  
285 toxicity [14] and nuclear loss of TDP-43 [13, 23, 24]. In this study, we showed that V5-PR36  
286 expression led to increased co-localization of Staufen with heterochromatin and that degrading  
287 RNAs via RNase led to decreased nuclear accumulation of Staufen. These data support the  
288 notion that in neurons with V5-PR36 expression, Staufen accumulates around heterochromatin  
289 and binds to dsRNA the degradation of which disperses nuclear-accumulated Staufen, leading  
290 to its nuclear egress. Nevertheless, whether other dsRBPs also localize near the  
291 heterochromatin upon induction of PR toxicity remains to be examined.

292           In this study, we found that PR expression led to increased staining of Fibrillar. What  
293 might best account for the increased amount of Fibrillar by PR toxicity? A previous study  
294 identified p53 as a repressor of *FBL* (which codes Fibrillar protein) promoter, thereby  
295 regulating the amount of Fibrillar, in various cancer cell lines [35]. Interestingly, another  
296 study showed that dsRNA induces reduction of p53 in HT1080 cells [36]. These pieces of data  
297 suggest that increased dsRNA production by PR toxicity may reduce p53, thereby disinhibiting  
298 Fibrillar production. Furthermore, we found that heterozygous mutation of *stau* enhanced the  
299 level of Fibrillar in C4 da neurons expressing V5-PR36, which appears to be a compensatory  
300 mechanism against PR toxicity. However, how heterozygous mutation of *stau* induces  
301 increased level of Fibrillar remains unknown. Interestingly, a previous study showed that  
302 knockdown of *STAUI* led to reduced half-life of *TP53* (a human homolog of *p53*) mRNA in  
303 H1299 cells upon actinomycin D treatment [37]. Based on this study, we speculate that in C4  
304 da neurons expressing V5-PR36, heterozygous *stau* mutation may have decreased p53 level,  
305 with subsequent increased Fibrillar production. In contrast to our speculation, a previous  
306 study showed that treatment of a high dose (10 $\mu$ mol/L) of PR<sub>20</sub> in SH-SY5Y cells led to  
307 increased level of p53, albeit with a significant amount of cell death [38]. Thus, further studies  
308 are required for a potential role of p53 in mediating Staufen-dependent PR toxicity.

309           In many neurodegenerative diseases, such as Huntington's disease, abnormal nuclear  
310 accumulation of proteins is known to be highly toxic [39, 40]. Although whether nuclear-  
311 accumulated Staufen is toxic in C9-ALS/FTD remains disputable, our results nevertheless are  
312 largely consistent with the notion that nuclear-accumulated Staufen can be toxic. Our results  
313 show that 1) Staufen accumulates in the nucleus and encroaches on the heterochromatin and  
314 nucleolus, possibly affecting their functions, 2) reducing *stau* dosage in PR-expressing neurons  
315 increased the amount of Fibrillar, which may be a compensatory response to PR toxicity, and  
316 3) *stau* heterozygous mutation rescues retinal degeneration and viability. In addition, a recent

317 proteomics study identified *Stau2*, an ortholog of *Drosophila* *Staufen* [41], to be commonly  
318 enriched in both PR and GR interactome in rat primary neurons [42]. Consistent with the  
319 previous study, we found that V5-PR36, which localizes predominantly to the nucleus, interacts  
320 with *Staufen* in *Drosophila* neurons (S6A Fig). This raises the possibility that *Staufen* may  
321 interact with PR in the nucleus in an RNA-dependent manner to contribute to toxicity. Finally,  
322 *Staufen* in the form of puncta in the nucleus may sequester various proteins and RNAs whose  
323 functions may be disrupted. On the other hand, *Staufen* puncta in the nucleus nearby  
324 heterochromatin and nucleolus may be benign; and reduction of *stau* may have rescued retinal  
325 degeneration and viability through reducing the level of cytoplasmic *Staufen*. Therefore,  
326 further in-depth study is necessary to clearly differentiate between nuclear and cytoplasmic  
327 *Staufen*-mediated toxicity.

328         A recent study showed that Spinocerebellar ataxia type 2 (SCA2) mouse model and  
329 human patients presented elevated level of *Stau1* protein whose interaction with polyQ-  
330 expanded ATXN2 caused neurotoxicity [43]. Reducing *STAUI* in SCA2 mouse improved  
331 motor behaviors and reduced polyQ-expanded ATXN2 aggregation. In the same study, they  
332 also showed an elevated level of *Stau1* in fibroblasts from ALS patients with TDP-43 G298S  
333 mutation [43]. However, whether increased *Stau1* level in the fibroblasts of ALS patients are  
334 toxic has not been explored. In our study, we showed that *Staufen* accumulates in the nucleus  
335 and that reducing *stau* suppressed retinal degeneration and rescued viability of flies exhibiting  
336 PR toxicity. Taken together, these data suggest that aberrant accumulation of *Staufen* in  
337 neurons is toxic and that its reduction might be a suitable therapeutic target for a spectrum of  
338 diseases including SCA2, ALS, and FTD.

339

340

341

342

## 343 **Materials and methods**

344

### 345 ***Drosophila* stocks**

346 All flies were maintained at 25 °C and 60 % humidity. The following lines were obtained from  
347 Bloomington *Drosophila* Stock Center (Indiana, USA): *w<sup>1118</sup>*(3605); *UAS-G<sub>4</sub>C<sub>2</sub>36* (58688);  
348 *UAS-G<sub>4</sub>C<sub>2</sub>36-RNA only* (58689); *UAS-PR36* (58694); *RFP-HP1* (30562); *stau<sup>ry9/+</sup>* (10742);  
349 *UAS-TBPH RNAi* (29517); *UAS-Luciferase* (35788); *elav-GeneSwitch(GS)-gal4* (43642);  
350 *D42-gal4* (8816); *GMR-gal4* (1104); and *elav-gal4* (8760). The following lines were obtained  
351 from Vienna *Drosophila* Resource Center (VDRC): *UAS-Fib RNAi* (104372KK) and *UAS-40D*  
352 (60101). *UAS-GFP-stau* was provided by Andrea Brand (University of Cambridge, UK); *UAS-*  
353 *mCD8RFP* and *PPK<sup>1a</sup>-gal4* were provided by Yuh Nung Jan (UCSF, USA). *ElavGS-gal4*  
354 expression was induced by feeding adult flies 100 μM of RU486 (Mifepristone) (Sigma.  
355 M8046) for 20 days after eclosion at 27 °C.

356

### 357 **Molecular cloning and generation of transgenic flies**

358 V5-PR36, HA-GR36, and Myc-PA36 were subcloned (Genscript, Inc.) into pACU2 vectors  
359 (from Chun Han, Cornell University) using BglIII and XhoI sites, and the epitopes were added  
360 at the N-terminus. Transgenic flies were generated by BestGene, Inc. The nucleotide sequences  
361 of the generated constructs are described below:

362

363 *BglIII-V5-PR36-XhoI*

364 5'-

365 **CACAGATCTCCACCATGGGTAAGCCTATCCCTAACCTCTCCTCGGTCTCGATT**  
366 **CTACGGGTGGAGGCGGTAGTCCTCGACCTAGACCAAGACCTCGGCCTAGGC**  
367 **CACGTCCTAGACCACGTCTTAGGCCACGACCTCGTCCTCGACCACGTCTC**  
368 **GTCCTAGGCCAGACCACGCCCTAGACCAAGACCCAGACCACGACCACGGC**  
369 **CTCGACCTAGGCCTCGTCCACGACCTCGCCCAAGACCTCGTCCGAGACCTA**  
370 **GGCCCAGACCTCGTCCTAGACCAAGACCCAGATGATAACTCGAGGCA-3'**

371

372 *BglIII-HA-GR36-XhoI*

373 5'-

374 **CACAGATCTCCACCATGTACCCATACGATGTTCCAGATTACGCTGGTGGAGGC**  
375 **GGTAGTGGTCGAGGACGTGGTCGAGGAAGAGGTCGTGGTCGTGGACGAGG**  
376 **TAGAGGACGTGGAAGAGGTCGAGGACGTGGTAGAGGTCGAGGAAGAGGTC**  
377 **GTGGACGAGGACGTGGTCGAGGAAGAGGTCGTGGTCGTGGACGAGGTAGA**  
378 **GGACGTGGAAGAGGTCGAGGACGTGGTAGAGGTCGAGGAAGAGGTCGTGG**  
379 **ACGAGGACGTGGTCGAGGAAGATGATAACTCGAGGCA-3'**

380

381 *BglIII-Myc-PA36-XhoI*

382 5'-

383 **CACAGATCTCCACCATGGAACAAAACTCATCTCAGAAGAGGATCTGGGTGGA**  
384 **GGCGGTAGTCCTGCCCTGCTCCAGCTCCAGCACCTGCACCAGCCCCAGCA**  
385 **CCTGCTCCAGCACCCGCGCCTGCACCAGCTCCAGCACCCGGCACCTGCTCCG**  
386 **GCACCTGCACCTGCGCCAGCTCCTGCTCCTGCGCCAGCTCCAGCACCCAGCA**  
387 **CCTGCTCCAGCTCCAGCTCCTGCACCAGCACCCGCGCACCTGCTCCAGCCCCA**  
388 **GCTCCTGCACCTGCTCCTGCATGATAACTCGAGGCA-3'**

389



## 390 **Immunohistochemistry (IHC)**

391 Third instar larvae were dissected and immediately fixed in 3.7 % formaldehyde (JUNSEI,  
392 #50-00-0) for 20 min at room temperature (RT). Formaldehyde was diluted in 1X phosphate  
393 buffered saline (PBS) (MENTOS). After washing three times at RT in 0.3 % PBST (0.3% triton  
394 X-100 in 1X PBS), the samples were incubated in the 5 % normal donkey serum (NDS) diluted  
395 in washing buffer (blocking buffer) for 1 hr at RT. Next, the samples were incubated in primary  
396 antibodies diluted in blocking buffer overnight at 4 °C. To detect GFP-Staufen, V5-PR36, and  
397 endogenous Fibrillarlin, the following primary antibodies were used: rabbit anti-GFP (Abcam,  
398 ab183734) (1:500); mouse anti-V5 (Thermo Scientific, R960-25) (1:500); and mouse anti-  
399 Fibrillarlin (Abcam, ab4566) (1:200). After washing five times for 10 min in washing buffer at  
400 RT, the samples were incubated with secondary antibodies diluted in blocking buffer for 2-4  
401 hours at RT. The following secondary antibodies were used: goat anti-rabbit Alexa 488  
402 (Invitrogen, A11034) (1:1000); goat anti-mouse Alexa 647 (Invitrogen, A21236) (1:1000 or  
403 1:400); and goat anti-HRP Cy3 (Jackson Immunoresearch Laboratories, #123-165-021)  
404 (1:200). The anti-HRP antibody was used to label the whole neuronal membranes of soma and  
405 dendrites. The samples were then washed five times for 5 min in washing buffer and mounted  
406 using mounting medium with DAPI (4',6-diamidino-2-phenylindole) (VECTASHIELD, H-  
407 1200) for imaging. DAPI was used for visualizing heterochromatin located in the nucleus. For  
408 IHC of adult brains and larval brains, all primary antibodies were diluted 1:200 and all  
409 secondary antibodies were diluted 1:400 in blocking buffer. All procedures in IHC experiments  
410 were performed in the dark.

411

## 412 **Imaging analysis**

413 Confocal images were acquired using LSM 780 (ZEISS) or LSM 800 (ZEISS) microscope. *In*  
414 *vivo* neuronal images of 3<sup>rd</sup> instar larvae were taken at 200x magnification with the confocal

415 microscope. Neuronal images from staining experiments in 3<sup>rd</sup> instar larvae were taken at 400x  
416 magnification with the confocal microscope. All C4 da neurons were acquired from the  
417 abdominal segments A4-A6. Retinal images were acquired using Leica SP5. Fly eyes (left eyes  
418 only) were taken at 160x magnification immediately upon dissection.

419

#### 420 **Ribonuclease A (RNase A) treatment**

421 Samples were incubated in 20 µg/ml of RNase A (Sigma, R6513) suspended in 1X PBS for 1  
422 hr at 37 °C before fixation. As controls, samples were incubated in 1X PBS instead of RNase  
423 A for 1 hr at 37 °C before fixation. The next steps of IHC were performed as described above.

424

#### 425 **RNA Fluorescent *in situ* hybridization (FISH)**

426 The protocol for protein-RNA double labeling in *Drosophila* ovaries [44] was slightly modified  
427 to apply FISH to C4 da neurons of third instar larval fillet. To confirm mRNA reduction in  
428 RNase A-treated C4 da neurons of third instar larvae, a Cy 5-tagged poly(A)-tail-targeting  
429 (Cy5-oligo-dT) probe was designed as follows: 5'-Cy5-TTT TTT TTT TTT TTT TT-3'  
430 (6555.6 g/mol MW, 37.9 °C Tm) (Macrogen Inc.). All procedures in FISH experiments were  
431 performed in the dark. In FISH experiments, IHC was first performed using dissected third  
432 instar larvae, but with different solutions from IHC described above: 0.1 % tween-20 (Biottech,  
433 #9005-64-5) diluted in 1X PBS (PBT); 3.7 % formaldehyde in PBT; and 1 % skim milk in  
434 PBT. Then, FISH procedures were applied to the samples as previously described [44]. 3 µM  
435 (tests for 0.1-5 µM) of a Cy5-oligo-dT probe was hybridized to the samples at 37.9 °C (Tm)  
436 overnight. The following FISH solutions were used: EtOH (Merk, #64-17-5); Xylenes (Sigma,  
437 #1330-20-7); RIPA (Biosesang, R2002); Formamide (Sigma, F9037); 5X SSC (Biosesang,  
438 S2012); Heparin (Sigma, H4784); DEPC-treated water (MENTOS, M1409). Finally, the  
439 samples were mounted for imaging.

440

#### 441 **Co-immunoprecipitation (co-IP)**

442 Co-IP experiments were performed as previously described [45] with some modifications listed  
443 below. More than 250 fly heads were collected from each line and suspended in 400  $\mu$ l lysis  
444 buffer (25mM Tris-buffered saline (Tris-HCl) pH 7.5, 150mM NaCl, 0.1 % tween-20, 1mM  
445 EDTA, 10 % Glycerol) with 1:100 ratio of protease inhibitor cocktail (Thermo Scientific,  
446 #87786). Samples were completely homogenized and then centrifuged at 13,300 rpm for 20  
447 min at 4 °C. Each sample containing equal amount of proteins was incubated overnight at 4 °C  
448 with mouse anti-V5 (1:500; Thermo Scientific, R960-25). Then, protein A/G plus-agarose  
449 beads (Santa Cruz, sc-2003) were added, and samples were further incubated for 3 hr at 4 °C  
450 on a nutator. After the samples were centrifuged three times at 3,200 rpm for 5 sec at 4 °C, the  
451 supernatant was discarded. The primary and secondary antibodies used to detect the bands are  
452 as follows: mouse anti-GFP (Santa Cruz, sc-9996) (1:1000); mouse anti-V5 (Thermo Scientific,  
453 R960-25) (1:1000); mouse anti-beta-tubulin (DSHB, E7-s) (1:1000); and goat anti-mouse IgG-  
454 HRP (Santa Cruz, sc-3697) (1:2000).

455

#### 456 **Image processing and statistical analysis**

457 Obtained confocal images were further analyzed using Image J for quantification of pixel  
458 number and mean intensity. Microsoft Excel was used to plot puncta patterns on the graph. For  
459 statistical analyses, GraphPad Prism 6.01 was used for two-tailed student's t-test and one-way  
460 ANOVA. Relative mean intensities and pixel values were calculated and used for analyses.  
461 Error bars show SEM and all p values were summarized with asterisks: \*p < 0.05; \*\*p < 0.05;  
462 \*\*\*p < 0.005; \*\*\*\*p < 0.0005.

463

464

465

## 466 **Acknowledgements and Funding**

467 This work was funded by the Ministry of Science, Information and Communications  
468 Technology (ICT) & Future Planning (19-BR-03-03) (to CMH), the KBRI Research Program  
469 of the Ministry of Science, ICT & Future Planning (19-BR-02-04) (to JK) (19-BR-02-03) (to  
470 H-JK), and Basic Science Research Program through the National Research Foundation of  
471 Korea, funded by the Ministry of Science and ICT (2018R1A2B6001607) (to SBL); the  
472 Development of Platform Technology for Innovative Medical Measurements Program from  
473 the Korea Research Institute of Standards and Science Grant (KRISS-2019-GP2019-0018) (to  
474 SBL). The funders had no role in study design, data collection and analysis, decision to publish,  
475 or preparation of the manuscript.

476

477

## 478 **Author Contributions**

479 **Conceptualization:** Sung Bae Lee, Eun Seon Kim, Chang Geon Chung

480 **Data curation:** Eun Seon Kim, Chang Geon Chung, Yoon Ha Kim

481 **Formal analysis:** Eun Seon Kim, Chang Geon Chung, Yoon Ha Kim, In Jun Cha, Jeong Hyang  
482 Park, Hyung-Jun Kim, Chang Man Han, Jaekwang Kim

483 **Funding acquisition:** Sung Bae Lee, Hyung-Jun Kim, Chang Man Han, Jaekwang Kim

484 **Investigation:** Eun Seon Kim, Chang Geon Chung, Yoon Ha Kim

485 **Methodology:** Eun Seon Kim, Chang Geon Chung, Yoon Ha Kim, In Jun Cha, Jeong Hyang  
486 Park

487 **Project Administration:** Sung Bae Lee

488 **Resources:** Sung Bae Lee

489 **Software:** Eun Seon Kim, Chang Geon Chung, Yoon Ha Kim

490 **Supervision:** Sung Bae Lee

491 **Validation:** Eun Seon Kim, Chang Geon Chung, Yoon Ha Kim

492 **Visualization:** Eun Seon Kim, Chang Geon Chung, Yoon Ha Kim

493 **Writing—Original Draft Preparation:** Eun Seon Kim, Chang Geon Chung

494 **Writing—Review & Editing:** Sung Bae Lee, Eun Seon Kim, Chang Geon Chung

495

496

497

498

499

500

501

502

503

504

505

506

507

508

509

510

511

512

513

514

## 515 **Figure legends**

### 516 **Fig 1. PR toxicity increases nuclear accumulation of Staufen in neurons.**

517 (A) V5-PR36 expression in C4 da neurons of third instar larvae significantly increased nuclear  
518 accumulation of GFP-Staufen (Genotypes. CTRL: *UAS-GFP-stau/+* ; *PPK<sup>1a</sup>-gal4>UAS-*  
519 *mCD8RFP/+*, *V5-PR36: UAS-GFP-stau/+* ; *PPK<sup>1a</sup>-gal4>UAS-mCD8RFP/UAS-V5-PR36*).

520 Bottom right insets are magnified images of the nuclei. Dashed circular lines (white) outline  
521 the nuclei. Arrow (white) indicates increased nuclear GFP-Staufen puncta. Scale bars (yellow),  
522 10  $\mu\text{m}$ ; (white), 2  $\mu\text{m}$ . (B) Individual nuclear GFP-Staufen puncta in C4 da neurons with  
523 denoted genotypes from Fig. 1a were counted and plotted. y-axis: relative mean intensity of  
524 GFP-Staufen puncta in nucleus; x-axis: relative pixel number of GFP-Staufen puncta in nuclei.

525  $n \geq 19$  GFP-Staufen puncta (C) The pixel number and the mean intensity of nuclear GFP-Staufen  
526 puncta (obtained from Fig 1B) were multiplied to provide an estimate of relative amount of  
527 nuclear GFP-Staufen. \*\* $p = 0.0022$  by two-tailed student's t-test; error bars,  $\pm$  SEM;  $n \geq 19$

528 GFP-Staufen puncta. (D) IHC of dissected third instar larval motor neurons shows that V5-  
529 PR36 expression increased nuclear accumulation of GFP-Staufen (Genotypes. CTRL: *UAS-*  
530 *GFP-stau/+* ; *D42-Gal4>UAS-mCD8RFP/+*, *V5-PR36: UAS-GFP-stau/+* ; *D42-Gal4>UAS-*  
531 *mCD8RFP/UAS-V5-PR36*). Dashed circular lines (white) outline the nuclei. Arrows (white)  
532 indicate stronger nuclear GFP-Staufen signal compared to the control. Scale bar (white), 5  $\mu\text{m}$ .

533 (E) IHC of adult central nervous system (CNS) neurons expressing V5-PR36 shows an increase  
534 in nuclear accumulation of GFP-Staufen (Genotypes. CTRL: *UAS-GFP-stau/+* ; *elavGS-*

535 *gal4/+*, *V5-PR36: UAS-GFP-stau/+* ; *elavGS-gal4/UAS-V5-PR36*). The transgenic expression  
536 was induced by feeding 100  $\mu$ M of RU486 for 20 days after eclosion at 27 °C. Dashed circular  
537 lines (white) outline the nuclei. Arrow (white) indicates stronger nuclear GFP-Staufen signal  
538 compared to the controls. Scale bar (white), 5  $\mu$ m.

539

540 **Fig. 2 Nuclear-accumulated Staufen partially co-localizes with heterochromatin in C4**  
541 **da neurons expressing PR36.**

542 (A) Nuclear-accumulated GFP-Staufen partially co-localizes with RFP-HP1 in V5-PR36-  
543 expressing C4 da neurons (Genotypes. CTRL: *UAS-GFP-stau/+* ; *PPK<sup>1a</sup>-gal4/RFP-HP1*,  
544 *PR36: UAS-GFP-stau/UAS-PR36* ; *PPK<sup>1a</sup>-gal4/RFP-HP1*). Dashed circular lines (white)  
545 outline the nuclei. Arrow (white) indicates co-localization between nuclear GFP-Staufen and  
546 RFP-HP1. Scale bar, 5  $\mu$ m. (B) 3D images of Fig 2B are presented to better visualize the  
547 overlap of GFP-Staufen and RFP-HP1 in the nucleus. Arrows (white) indicate co-localization  
548 between nuclear GFP-Staufen and RFP-HP1 (white). (C) The proportion of RFP-HP1 puncta  
549 that co-localize with GFP-Staufen were individually measured and plotted. \*p = 0.0339 by  
550 two-tailed student's t-test; error bars,  $\pm$  SEM; n $\geq$ 25 RFP-HP1 puncta. (D) IHC of dissected  
551 third instar larvae shows that nuclear-accumulated GFP-Staufen partially co-localizes with  
552 DAPI in V5-PR36-expressing C4 da neurons (Genotypes. CTRL: *UAS-GFP-stau/+* ; *PPK<sup>1a</sup>-*  
553 *gal4>UAS-mCD8RFP/+*, *V5-PR36: UAS-GFP-stau/+* ; *PPK<sup>1a</sup>-gal4>UAS-mCD8RFP/UAS-*  
554 *V5-PR36*). DAPI (blue) staining labels heterochromatin. Dashed circular lines (white) outline  
555 the nuclei. Arrow (white) indicates co-localization between nuclear GFP-Staufen and DAPI.  
556 Scale bar, 2  $\mu$ m. (E) 3D images of Fig 2D are presented to better visualize the overlap of GFP-  
557 Staufen and DAPI in the nucleus. Arrows (white) indicate co-localization between nuclear  
558 GFP-Staufen and DAPI (white).

559

560 **Fig. 3 PR toxicity in C4 da neurons induce RNA-dependent accumulation of Staufen in**  
561 **the nucleus.**

562 (A) RNase A treatment decreased nuclear accumulation of GFP-Staufen induced by PR toxicity  
563 in C4 da neurons (Genotypes. *V5-PR36: UAS-GFP-stau/+* ; *PPK<sup>1a</sup>-gal4>UAS-*  
564 *mCD8RFP/UAS-V5-PR36*). Dissected third instar larvae were treated for 1 hr at 37 °C with  
565 (RNase A) or without (PBS<sub>CTRL</sub>) 20 µg/ml of RNase A. Dashed lines (white) indicate the  
566 outlines of the nuclei. Arrow (white) indicates faint nuclear GFP-Staufen signals remained after  
567 RNase A treatment. Scale bar, 5 µm. (B) Nuclear GFP-Staufen puncta in C4 da neurons with  
568 denoted genotypes from Fig 3A were counted and plotted. y-axis: relative mean intensity of  
569 GFP-Staufen puncta in nuclei; x-axis: relative pixel number of GFP-Staufen puncta in nuclei.  
570 n≥16 GFP-Staufen puncta. (C) The pixel number and the mean intensity of nuclear GFP-  
571 Staufen puncta (obtained from Fig 3B) were multiplied to provide an estimate of relative  
572 amount of nuclear GFP-Staufen. \*p = 0.0334 by two-tailed student's t-test; error bars, ± SEM;  
573 n≥16 GFP-Staufen puncta.

574

575 **Fig. 4 Increased Fibrillarin expression by reduced *stau* dosage is a compensatory**  
576 **response to PR toxicity in *Drosophila*.**

577 (A) IHC of dissected third instar larvae shows that heterozygous loss of *stau* increased  
578 nucleolar expression of Fibrillarin in V5-PR36-expressing C4 da neurons (Genotypes. *w<sup>1118</sup> +*  
579 *V5-PR36: +/+* ; *PPK<sup>1a</sup>-gal4>UAS-mCD8RFP/UAS-V5-PR36*, *stau<sup>+/-</sup> + V5-PR36: stau<sup>ry9/+</sup>*;  
580 *PPK<sup>1a</sup>-gal4>UAS-mCD8RFP/UAS-V5-PR36*). Dashed lines (white) indicate the outlines of the  
581 nuclei. Arrow (white) indicates increased Fibrillarin signal after reducing *stau* dosage. Scale  
582 bar, 5 µm. (B) The relative pixel number was multiplied by the relative mean intensity of  
583 Fibrillarin puncta to estimate the relative amount of Fibrillarin in C4 da neurons with the



584 denoted genotypes from Fig 4A. \*p = 0.0371 by two-tailed student's t-test; error bars,  $\pm$  SEM;  
585  $n \geq 18$  Fibrillar puncta. (C) Knockdown of *Fib* exacerbated retinal degeneration induced by  
586 PR36 toxicity (Genotypes. *Fib RNAi*: *GMR-gal4/UAS-Fib RNAi*, CTRL + PR36: *GMR-*  
587 *gal4>UAS-PR36/UAS-40D*, *Fib RNAi* + PR36: *GMR-gal4>UAS-PR36/UAS-Fib RNAi*). Fly  
588 eyes were imaged at 4 days after eclosion. Images were acquired using 160X objective lens.  
589 n=10.

590

591 **Fig. 5 Reduction of *stau* dosage suppresses PR toxicity in *Drosophila*.**

592 (A) Heterozygous loss of *stau* restored PR36-induced retinal degeneration (Genotypes. *stau*<sup>+/-</sup>:  
593 *GMR-gal4/stau*<sup>y9/+</sup>; +/+ , *w<sup>1118</sup>* + PR36: *GMR-gal4>UAS-PR36* ; +/+ , *stau*<sup>+/-</sup> + PR36: *GMR-*  
594 *gal4>UAS-PR36/stau*<sup>y9/+</sup> ; +/+). Fly eyes were imaged at 4 days after eclosion. Images were  
595 acquired using 160X objective lens. n=9. (B) Heterozygous loss of *stau* restored viability of  
596 flies expressing V5-PR36 (Genotypes. *stau*<sup>+/-</sup>: *stau*<sup>y9/+</sup> ; *elav-gal4/+*, *V5-PR36*: +/+ ; *elav-*  
597 *gal4/UAS-V5-PR36*, *stau*<sup>+/-</sup> + *V5-PR36*: *stau*<sup>y9/+</sup> ; *elav-gal4/UAS-V5-PR36*). First instar larvae  
598 were collected separately per each line at 25 °C. Surviving pupae and eclosed adult flies were  
599 tallied and listed. Percentages of first instar larvae-to-pupae and first instar larvae-to-adults are  
600 denoted in parentheses. (C) The percentages of first instar larva-to-adult viability obtained from  
601 three independent experiments were plotted and compared: *stau*<sup>+/-</sup> to *V5-PR36* and *V5-PR36*  
602 to *stau*<sup>+/-</sup> + *V5-PR36*. \*\*p = 0.0022; \*p = 0.0131 by one-way ANOVA; error bars,  $\pm$  SEM; n=3  
603 vials.

604

605

606

607

608

609

## 610 **Supporting information**

### 611 **S1 Fig. Arginine-rich DPR-expressing constructs increase nuclear accumulation of**

#### 612 **Staufen.**

613 (A) *In vivo* imaging of *Drosophila* third instar larval C4 da neurons shows that *C9orf72*  
614 constructs expressing arginine-rich DPRs increased nuclear accumulation of GFP-Staufen  
615 (Genotypes. CTRL: *UAS-GFP-stau/+* ; *PPK<sup>1a</sup>-gal4>UAS-mCD8RFP/+*, *G<sub>4</sub>C<sub>2</sub>36*: *UAS-GFP-*  
616 *stau/UAS-G<sub>4</sub>C<sub>2</sub>36* ; *PPK<sup>1a</sup>-gal4>UAS-mCD8RFP/+*, *G<sub>4</sub>C<sub>2</sub>36-RNA only*: *UAS-GFP-stau/UAS-*  
617 *G<sub>4</sub>C<sub>2</sub>36-RNA only* ; *PPK<sup>1a</sup>-gal4>UAS-mCD8RFP/+*, *Myc-PA36*: *UAS-GFP-stau/+* ; *PPK<sup>1a</sup>-*  
618 *gal4>UAS-mCD8RFP/UAS-Myc-PA36*, *HA-GR36*: *UAS-GFP-stau/+* ; *PPK<sup>1a</sup>-gal4>UAS-*  
619 *mCD8RFP/UAS-HA-GR36*). Magnified images of the nuclei of left panels are presented at the  
620 bottom of each image; scale bar (yellow), 2  $\mu$ m. Dashed circular lines (white) outline the nuclei.  
621 Arrows (white) indicate stronger nuclear GFP-Staufen signals compared to the controls. Scale  
622 bar (white), 10  $\mu$ m. (B) Nuclear GFP-Staufen puncta in C4 da neurons with denoted genotypes  
623 from S1A Fig were counted and plotted. y-axis: relative mean intensity of GFP-Staufen puncta  
624 in nucleus; x-axis: relative pixel number of GFP-Staufen puncta in nucleus.  $n \geq 17$  GFP-  
625 Staufen puncta. (C) The pixel number and the mean intensity of nuclear GFP-Staufen puncta  
626 (obtained from S1B Fig) were multiplied to provide an estimate of relative amount of nuclear  
627 GFP-Staufen. ns: not significant; \*\*p = 0.0037; \*\*\*p = 0.0004 by two-tailed student's t-test;  
628 error bars,  $\pm$  SEM;  $n \geq 17$  GFP-Staufen puncta.

629

### 630 **S2 Fig. *TBPH* knockdown increases nuclear accumulation of Staufen in neurons.**

631 (A) *In vivo* imaging shows that *TBPH* RNAi increases nuclear accumulation of Staufen in C4

632 da neurons of third instar larvae (Genotypes. CTRL: *UAS-GFP-stau/+* ; *PPK<sup>1a</sup>-gal4>UAS-*  
633 *mCD8RFP/UAS-Luciferase*, *TBPH RNAi*: *UAS-GFP-stau/+* ; *PPK<sup>1a</sup>-gal4>UAS-*  
634 *mCD8RFP/UAS-TBPH RNAi*). Magnified images of the nuclei in the left panels are presented  
635 at the bottom of images; scale bar (yellow), 1  $\mu$ m. Dashed circular lines (white) outline the  
636 nuclei. Arrow (white) indicates stronger nuclear GFP-Staufen signal compared to the control.  
637 Scale bar (white), 10  $\mu$ m; (yellow), 1  $\mu$ m. (B) Nuclear GFP-Staufen puncta in C4 da neurons  
638 with denoted genotypes from S2A Fig were counted and plotted. y-axis: relative mean intensity  
639 of GFP-Staufen puncta in nucleus; x-axis: relative pixel number of GFP-Staufen puncta in  
640 nucleus.  $n \geq 57$  GFP-Staufen puncta. (C) The pixel number and the mean intensity of nuclear  
641 GFP-Staufen puncta (obtained from S2B Fig) were multiplied to provide an estimate of relative  
642 amount of nuclear GFP-Staufen. \*\*\*\* $p < 0.0001$  by two-tailed student's t-test; error bars,  $\pm$   
643 SEM;  $n \geq 57$  GFP-Staufen puncta. (D) The numbers of nuclear GFP-Staufen puncta (obtained  
644 from S2B Fig) were counted and compared. \* $p = 0.0179$  by two-tailed student's t-test; error  
645 bars,  $\pm$  SEM;  $n=10$  neurons.

646

### 647 **S3 Fig. RNase A treatment efficiently reduces RNA levels detected via RNA FISH.**

648 (A) RNA FISH of dissected third instar larvae confirms the effect of RNase A treatment on  
649 decreasing mRNA amount in V5-PR36-expressing C4 da neurons (Genotype. *V5-PR36: UAS-*  
650 *GFP-stau/+* ; *PPK<sup>1a</sup>-gal4>UAS-mCD8RFP/UAS-V5-PR36*). 3  $\mu$ M of Cy5-oligo-dT DNA  
651 probe was used to detect mRNA. Dissected third instar larvae were treated for 1 hr at 37  $^{\circ}$ C  
652 with (RNase A) or without (PBS<sub>CTRL</sub>) 20  $\mu$ g/ml of RNase A. Dashed circular lines (white)  
653 outline the nuclei. Scale bar (white), 5  $\mu$ m. (B) Intensity profiles of fluorescent signals  
654 representing nuclear GFP-Staufen (Green) and mRNA (Red) show decreased nuclear  
655 accumulation of GFP-Staufen after RNase A treatment. y-axis: intensity of fluorescent signals;

656 x-axis: distance ( $\mu\text{m}$ ). Top right insets are the images used for measuring intensity profiles of  
657 fluorescent signals; solid line (yellow) is x-axis (distance). Scale bar (white), 2  $\mu\text{m}$ .

658

659 **S4 Fig. Nuclear-accumulated Staufen is contiguous to Fibrillarin that is increased by PR**  
660 **toxicity in C4 da neurons.**

661 (A) IHC of dissected third instar larvae shows that nuclear-accumulated GFP-Staufen is  
662 contiguous to Fibrillarin, the expression of which was increased in V5-PR36-expressing C4 da  
663 neurons (Genotypes. CTRL: *UAS-GFP-stau/+* ; *PPK<sup>1a</sup>-gal4>UAS-mCD8RFP/+*, *V5-PR36:*  
664 *UAS-GFP-stau/+* ; *PPK<sup>1a</sup>-gal4>UAS-mCD8RFP/UAS-V5-PR36*). Dashed circular lines  
665 (white) outline the nuclei. Arrow (white) indicates conjunction of nuclear-accumulated GFP-  
666 Staufen with Fibrillarin. Scale bar, 5  $\mu\text{m}$ . (B) 3D images of S4A Fig are presented to better  
667 visualize the conjunction of GFP-Staufen with Fibrillarin in the nucleus. Arrows (white)  
668 indicate the overlap between nuclear-accumulated GFP-Staufen (green) and Fibrillarin (white).

669

670 **S5 Fig. PR toxicity increases nucleolar expression of Fibrillarin in neurons.**

671 (A) IHC shows that nucleolar expression of Fibrillarin is increased by V5-PR36 expression in  
672 C4 da neurons (Genotypes. CTRL: *+/+*; *PPK<sup>1a</sup>-gal4>UAS-mCD8RFP/UAS-pACU2-empty*,  
673 *V5-PR36: +/+*; *PPK<sup>1a</sup>-gal4>UAS-mCD8RFP/UAS-V5-PR36*). Dashed lines (white) indicate  
674 the outlines of the nuclei. Arrow (white) indicates stronger Fibrillarin signal by PR toxicity  
675 compared to the control. Scale bar, 5  $\mu\text{m}$ . (B) The pixel number and the mean intensity of  
676 Fibrillarin (obtained from S5A Fig) were multiplied to provide an estimate of relative amount  
677 of Fibrillarin. \**p* = 0.0195 by two-tailed student's t-test; error bars,  $\pm$  SEM; *n*  $\geq$  7 Fibrillarin  
678 puncta.

679

680 **S6 Fig. Staufen physically interacts with PR in *Drosophila* brains.**

681 (A) Co-IP shows that GFP-Staufen forms a complex with V5-PR36 in V5-PR36-expressing  
682 adult fly brains (Genotypes. *V5-PR36*: +/+ ; *elavGS-gal4/UAS-V5-PR36*, *GFP-stau* + *V5-*  
683 *PR36*: *UAS-GFP-stau* /+ ; *elavGS-gal4/UAS-V5-PR36*). The transgenic expression was  
684 induced by feeding 100  $\mu$ M of RU486 for 20 days after eclosion at 27 °C.  $\beta$ -tubulin was used  
685 as an internal control. n=3.

686

687

688

689

690

691

692

693

694

695

696

697

698

699

700

701

702

703

## 704 **References**

- 705 1. Taylor JP, Brown RH, Cleveland DW. Decoding ALS: from genes to mechanism.  
706 Nature. 2016;539(7628):197-206. doi: 10.1038/nature20413. PubMed PMID:  
707 WOS:000387318500030.
- 708 2. DeJesus-Hernandez M, Mackenzie IR, Boeve BF, Boxer AL, Baker M, Rutherford NJ,  
709 et al. Expanded GGGGCC Hexanucleotide Repeat in Noncoding Region of C9ORF72 Causes  
710 Chromosome 9p-Linked FTD and ALS. Neuron. 2011;72(2):245-56. doi:  
711 10.1016/j.neuron.2011.09.011. PubMed PMID: WOS:000296224000008.
- 712 3. Renton AE, Majounie E, Waite A, Simon-Sanchez J, Rollinson S, Gibbs JR, et al. A  
713 Hexanucleotide Repeat Expansion in C9ORF72 Is the Cause of Chromosome 9p21-Linked  
714 ALS-FTD. Neuron. 2011;72(2):257-68. doi: 10.1016/j.neuron.2011.09.010. PubMed PMID:  
715 WOS:000296224000009.
- 716 4. Gendron TF, Bieniek KF, Zhang YJ, Jansen-West K, Ash PEA, Caulfield T, et al.  
717 Antisense transcripts of the expanded C9ORF72 hexanucleotide repeat form nuclear RNA foci  
718 and undergo repeat-associated non-ATG translation in c9FTD/ALS. Acta Neuropathol.  
719 2013;126(6):829-44. doi: 10.1007/s00401-013-1192-8. PubMed PMID:  
720 WOS:000327100500005.
- 721 5. Lee YB, Chen HJ, Peres JN, Gomez-Deza J, Attig J, Stalekar M, et al. Hexanucleotide  
722 Repeats in ALS/FTD Form Length-Dependent RNA Foci, Sequester RNA Binding Proteins,  
723 and Are Neurotoxic. Cell Rep. 2013;5(5):1178-86. doi: 10.1016/j.celrep.2013.10.049. PubMed  
724 PMID: WOS:000328266400003.
- 725 6. Ash PEA, Bieniek KF, Gendron TF, Caulfield T, Lin WL, DeJesus-Hernandez M, et

- 726 al. Unconventional Translation of C9ORF72 GGGGCC Expansion Generates Insoluble  
727 Polypeptides Specific to c9FTD/ALS. *Neuron*. 2013;77(4):639-46. doi:  
728 10.1016/j.neuron.2013.02.004. PubMed PMID: WOS:000315561300007.
- 729 7. Mori K, Arzberger T, Grasser FA, Gijssels I, May S, Rentzsch K, et al. Bidirectional  
730 transcripts of the expanded C9orf72 hexanucleotide repeat are translated into aggregating  
731 dipeptide repeat proteins. *Acta Neuropathol*. 2013;126(6):881-93. doi: 10.1007/s00401-013-  
732 1189-3. PubMed PMID: WOS:000327100500008.
- 733 8. Freibaum BD, Taylor JP. The Role of Dipeptide Repeats in C9ORF72-Related ALS-  
734 FTD. *Front Mol Neurosci*. 2017;10. doi: ARTN 35  
735 10.3389/fnmol.2017.00035. PubMed PMID: WOS:000393869000001.
- 736 9. Freibaum BD, Lu YB, Lopez-Gonzalez R, Kim NC, Almeida S, Lee KH, et al.  
737 GGGGCC repeat expansion in C9orf72 compromises nucleocytoplasmic transport. *Nature*.  
738 2015;525(7567):129-+. doi: 10.1038/nature14974. PubMed PMID: WOS:000360594100039.
- 739 10. Jovicic A, Mertens J, Boeynaems S, Bogaert E, Chai N, Yamada SB, et al. Modifiers  
740 of C9orf72 dipeptide repeat toxicity connect nucleocytoplasmic transport defects to FTD/ALS.  
741 *Nat Neurosci*. 2015;18(9):1226-+. doi: 10.1038/nn.4085. PubMed PMID:  
742 WOS:000360292600009.
- 743 11. Rossi S, Serrano A, Gerbino V, Giorgi A, Di Francesco L, Nencini M, et al. Nuclear  
744 accumulation of mRNAs underlies G4C2-repeat-induced translational repression in a cellular  
745 model of C9orf72 ALS. *J Cell Sci*. 2015;128(9):1787-99. doi: 10.1242/jcs.165332. PubMed  
746 PMID: WOS:000354873100013.
- 747 12. Zhang K, Donnelly CJ, Haeusler AR, Grima JC, Machamer JB, Steinwald P, et al. The  
748 C9orf72 repeat expansion disrupts nucleocytoplasmic transport. *Nature*. 2015;525(7567):56-  
749 +. doi: 10.1038/nature14973. PubMed PMID: WOS:000360594100024.
- 750 13. Saldi TK, Ash PEA, Wilson G, Gonzales P, Garrido-Lecca A, Roberts CM, et al. TDP-

- 751 1, the *Caenorhabditis elegans* ortholog of TDP-43, limits the accumulation of double-stranded  
752 RNA. *Embo J.* 2014;33(24):2947-66. doi: DOI 10.15252/embj.201488740. PubMed PMID:  
753 WOS:000346562000008.
- 754 14. Zhang YJ, Guo L, Gonzales PK, Gendron TF, Wu YW, Jansen-West K, et al.  
755 Heterochromatin anomalies and double-stranded RNA accumulation underlie *C9orf72*  
756 poly(PR) toxicity. *Science.* 2019;363(6428):707-+. doi: ARTN eaav2606  
757 10.1126/science.aav2606. PubMed PMID: WOS:000458874100023.
- 758 15. Zhang K, Grima JC, Rothstein JD, Lloyd TE. Nucleocytoplasmic transport in *C9orf72*-  
759 mediated ALS/FTD. *Nucleus-Phila.* 2016;7(2):132-7. doi: 10.1080/19491034.2016.1172152.  
760 PubMed PMID: WOS:000380238600005.
- 761 16. Neumann M, Sampathu DM, Kwong LK, Truax AC, Micsenyi MC, Chou TT, et al.  
762 Ubiquitinated TDP-43 in frontotemporal lobar degeneration and amyotrophic lateral sclerosis.  
763 *Science.* 2006;314(5796):130-3. doi: 10.1126/science.1134108. PubMed PMID:  
764 WOS:000241031200052.
- 765 17. Lichtenstein M, Guo W, Tartakoff AM. Control of nuclear export of hnRNP A1.  
766 *Traffic.* 2001;2(4):261-7. doi: DOI 10.1034/j.1600-0854.2001.1o002.x. PubMed PMID:  
767 WOS:000170605700004.
- 768 18. Ayala YM, Zago P, D'Ambrogio A, Xu YF, Petrucelli L, Buratti E, et al. Structural  
769 determinants of the cellular localization and shuttling of TDP-43. *J Cell Sci.*  
770 2008;121(22):3778-85. doi: 10.1242/jcs.038950. PubMed PMID: WOS:000260663500011.
- 771 19. Machamer JB, Woolums BM, Fuller GG, Lloyd TE. FUS causes synaptic  
772 hyperexcitability in *Drosophila* dendritic arborization neurons. *Brain Res.* 2018;1693:55-66.  
773 doi: 10.1016/j.brainres.2018.03.037. PubMed PMID: WOS:000436911200006.
- 774 20. Boeynaems S, Bogaertl E, Michiels E, Gijssels I, Sieben A, Jovicic A, et al.  
775 *Drosophila* screen connects nuclear transport genes to DPR pathology in c9ALS/FTD. *Sci Rep-*



- 776 Uk. 2016;6. doi: ARTN 20877  
777 10.1038/srep20877. PubMed PMID: WOS:000369936600001.
- 778 21. Shi KY, Mori E, Nizami ZF, Lin Y, Kato M, Xiang SH, et al. Toxic PRn poly-  
779 dipeptides encoded by the C9orf72 repeat expansion block nuclear import and export. P Natl  
780 Acad Sci USA. 2017;114(7):E1111-E7. doi: 10.1073/pnas.1620293114. PubMed PMID:  
781 WOS:000393989300011.
- 782 22. Balendra R, Isaacs AM. C9orf72-mediated ALS and FTD: multiple pathways to  
783 disease. Nat Rev Neurol. 2018;14(9):544-58. doi: 10.1038/s41582-018-0047-2. PubMed  
784 PMID: WOS:000443071600009.
- 785 23. Saldi TK, Gonzales P, Garrido-Lecca A, Dostal V, Roberts CM, Petrucelli L, et al.  
786 The Caenorhabditis elegans Ortholog of TDP-43 Regulates the Chromatin Localization of the  
787 Heterochromatin Protein 1 Homolog HPL-2. Mol Cell Biol. 2018;38(15). doi: UNSP e00668-  
788 17  
789 10.1128/MCB.00668-17. PubMed PMID: WOS:000438885000005.
- 790 24. Liu EY, Russ J, Cali CP, Phan JM, Amlie-Wolf A, Lee EB. Loss of Nuclear TDP-43  
791 Is Associated with Decondensation of LINE Retrotransposons. Cell Rep. 2019;27(5):1409-+.  
792 doi: 10.1016/j.celrep.2019.04.003. PubMed PMID: WOS:000466484100010.
- 793 25. Pontvianne F, Blevins T, Chandrasekhara C, Mozgova I, Hassel C, Pontes OMF, et al.  
794 Subnuclear partitioning of rRNA genes between the nucleolus and nucleoplasm reflects  
795 alternative epiallelic states. Gene Dev. 2013;27(14):1545-50. doi: 10.1101/gad.221648.113.  
796 PubMed PMID: WOS:000322011500002.
- 797 26. Macchi P, Brownawell AM, Grunewald B, DesGroseillers L, Macara IG, Kiebler MA.  
798 The brain-specific double-stranded RNA-binding protein Staufen2 - Nucleolar accumulation  
799 and isoform-specific exportin-5-dependent export. J Biol Chem. 2004;279(30):31440-4. doi:  
800 10.1074/jbc.C400226200. PubMed PMID: WOS:000222726800065.

- 801 27. Kiebler MA, Jansen RP, Dahm R, Macchi P. A putative nuclear function for  
802 mammalian Staufen. *Trends Biochem Sci.* 2005;30(5):228-31. doi: 10.1016/j.tibs.2005.03.005.  
803 PubMed PMID: WOS:000229466300004.
- 804 28. Martel C, Macchi P, Furic L, Kiebler MA, DesGroseillers L. Staufen1 is imported into  
805 the nucleolus via a bipartite nuclear localization signal and several modulatory determinants.  
806 *Biochem J.* 2006;393:245-54. doi: 10.1042/Bj20050694. PubMed PMID:  
807 WOS:000234412400025.
- 808 29. Herrmann D, Parlato R. C9orf72-associated neurodegeneration in ALS-FTD: breaking  
809 new ground in ribosomal RNA and nucleolar dysfunction. *Cell Tissue Res.* 2018;373(2):351-  
810 60. Epub 2018/02/17. doi: 10.1007/s00441-018-2806-1. PubMed PMID: 29450726.
- 811 30. Hernandez-Verdun D, Roussel P, Thiry M, Sirri V, Lafontaine DLJ. The nucleolus:  
812 structure/function relationship in RNA metabolism. *Wires Rna.* 2010;1(3):415-31. doi:  
813 10.1002/wrna.39. PubMed PMID: WOS:000208267300006.
- 814 31. Corman A, Jung BM, Haggblad M, Brautigam L, Lafarga V, Lidemalm L, et al. A  
815 Chemical Screen Identifies Compounds Limiting the Toxicity of C9ORF72 Dipeptide Repeats.  
816 *Cell Chem Biol.* 2019;26(2):235-+. doi: 10.1016/j.chembiol.2018.10.020. PubMed PMID:  
817 WOS:000460048700009.
- 818 32. Goodman LD, Prudencio M, Kramer NJ, Martinez-Ramirez LF, Srinivasan AR, Lan  
819 M, et al. Toxic expanded GGGGCC repeat transcription is mediated by the PAF1 complex in  
820 C9orf72-associated FTD. *Nat Neurosci.* 2019;22(6):863-+. doi: 10.1038/s41593-019-0396-1.  
821 PubMed PMID: WOS:000468883100006.
- 822 33. Kapeli K, Martinez FJ, Yeo GW. Genetic mutations in RNA-binding proteins and their  
823 roles in ALS. *Hum Genet.* 2017;136(9):1193-214. doi: 10.1007/s00439-017-1830-7. PubMed  
824 PMID: WOS:000410757000012.
- 825 34. Stjohnston D, Brown NH, Gall JG, Jantsch M. A Conserved Double-Stranded Rna-

- 826 Binding Domain. *P Natl Acad Sci USA*. 1992;89(22):10979-83. doi: DOI  
827 10.1073/pnas.89.22.10979. PubMed PMID: WOS:A1992JY87400086.
- 828 35. Marcel V, Ghayad SE, Belin S, Therizols G, Morel AP, Solano-Gonzalez E, et al. p53  
829 Acts as a Safeguard of Translational Control by Regulating Fibrillarin and rRNA Methylation  
830 in Cancer. *Cancer Cell*. 2013;24(3):318-30. doi: 10.1016/j.ccr.2013.08.013. PubMed PMID:  
831 WOS:000326908100011.
- 832 36. Marques JT, Rebouillat D, Ramana CV, Murakami J, Hill JE, Gudkov A, et al. Down-  
833 regulation of p53 by double-stranded RNA modulates the antiviral response. *J Virol*.  
834 2005;79(17):11105-14. doi: 10.1128/Jvi.79.17.11105-11114.2005. PubMed PMID:  
835 WOS:000231303900025.
- 836 37. Siprashvili Z, Webster DE, Kretz M, Johnston D, Rinn JL, Chang HY, et al.  
837 Identification of proteins binding coding and non-coding human RNAs using protein  
838 microarrays. *Bmc Genomics*. 2012;13. doi: Artn 633  
839 10.1186/1471-2164-13-633. PubMed PMID: WOS:000314649200001.
- 840 38. Wang R, Xu X, Hao Z, Zhang S, Wu D, Sun H, et al. Poly-PR in C9ORF72-Related  
841 Amyotrophic Lateral Sclerosis/Frontotemporal Dementia Causes Neurotoxicity by Clathrin-  
842 Dependent Endocytosis. *Neurosci Bull*. 2019. Epub 2019/05/31. doi: 10.1007/s12264-019-  
843 00395-4. PubMed PMID: 31148094.
- 844 39. Chung CG, Lee H, Lee SB. Mechanisms of protein toxicity in neurodegenerative  
845 diseases. *Cell Mol Life Sci*. 2018;75(17):3159-80. doi: 10.1007/s00018-018-2854-4. PubMed  
846 PMID: WOS:000440101300005.
- 847 40. Woulfe JM. Abnormalities of the nucleus and nuclear inclusions in neurodegenerative  
848 disease: a work in progress. *Neuropath Appl Neuro*. 2007;33(1):2-42. doi: 10.1111/j.1365-  
849 2990.2006.00819.x. PubMed PMID: WOS:000243478600002.
- 850 41. Buchner G, Bassi MT, Andolfi G, Ballabio A, Franco B. Identification of a novel

- 851 homolog of the *Drosophila* staufen protein in the chromosome 8q13-q21.1 region. *Genomics*.  
852 1999;62(1):113-8. Epub 1999/12/10. doi: 10.1006/geno.1999.6015. PubMed PMID: 10585778.
- 853 42. Hartmann H, Hornburg D, Czuppa M, Bader J, Michaelsen M, Farny D, et al.  
854 Proteomics and C9orf72 neuropathology identify ribosomes as poly-GR/PR interactors driving  
855 toxicity. *Life Sci Alliance*. 2018;1(2):e201800070. Epub 2018/11/21. doi:  
856 10.26508/lsa.201800070. PubMed PMID: 30456350; PubMed Central PMCID:  
857 PMC6238541.
- 858 43. Paul S, Dansithong W, Figueroa KP, Scoles DR, Pulst SM. Staufen1 links RNA stress  
859 granules and autophagy in a model of neurodegeneration. *Nat Commun*. 2018;9(1):3648. Epub  
860 2018/09/09. doi: 10.1038/s41467-018-06041-3. PubMed PMID: 30194296; PubMed Central  
861 PMCID: PMC6128856.
- 862 44. Zimmerman SG, Peters NC, Altaras AE, Berg CA. Optimized RNA ISH, RNA FISH  
863 and protein-RNA double labeling (IF/FISH) in *Drosophila* ovaries. *Nat Protoc*.  
864 2013;8(11):2158-79. doi: 10.1038/nprot.2013.136. PubMed PMID: WOS:000326164100007.
- 865 45. Chung CG, Kwon MJ, Jeon KH, Hyeon DY, Han MH, Park JH, et al. Golgi Outpost  
866 Synthesis Impaired by Toxic Polyglutamine Proteins Contributes to Dendritic Pathology in  
867 Neurons. *Cell Rep*. 2017;20(2):356-69. doi: 10.1016/j.celrep.2017.06.059. PubMed PMID:  
868 WOS:000405198100008.

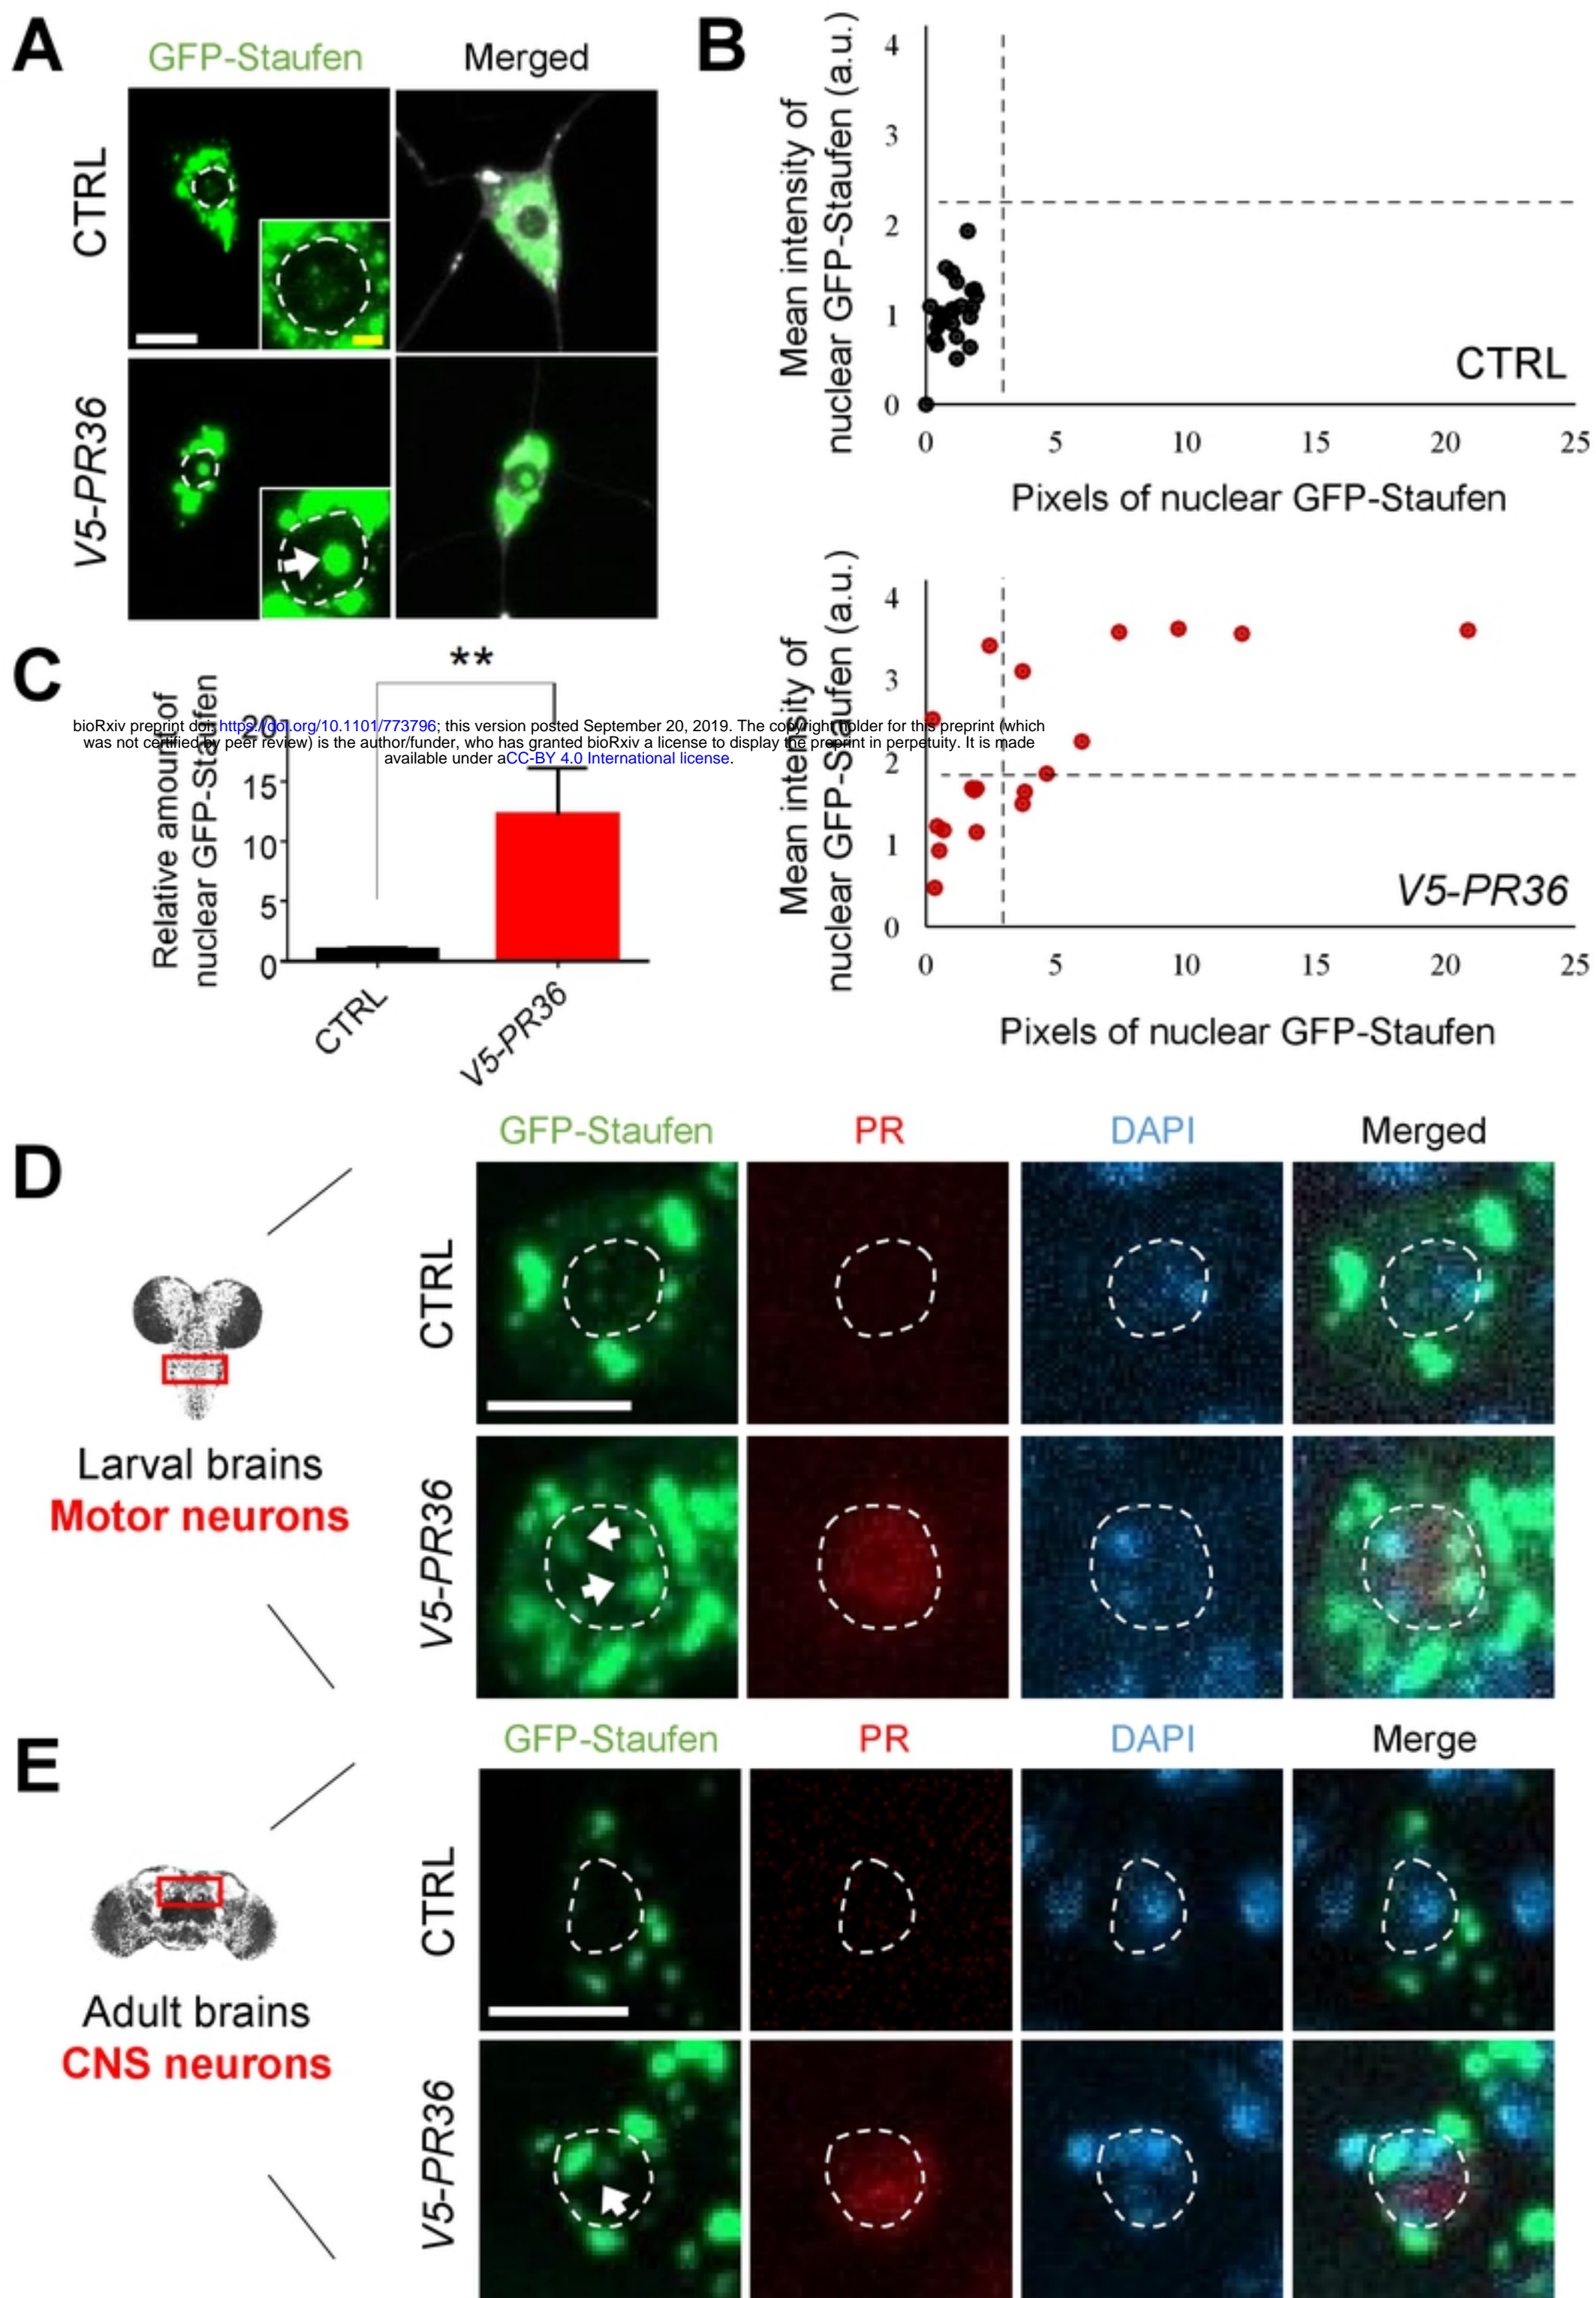

Fig 1.

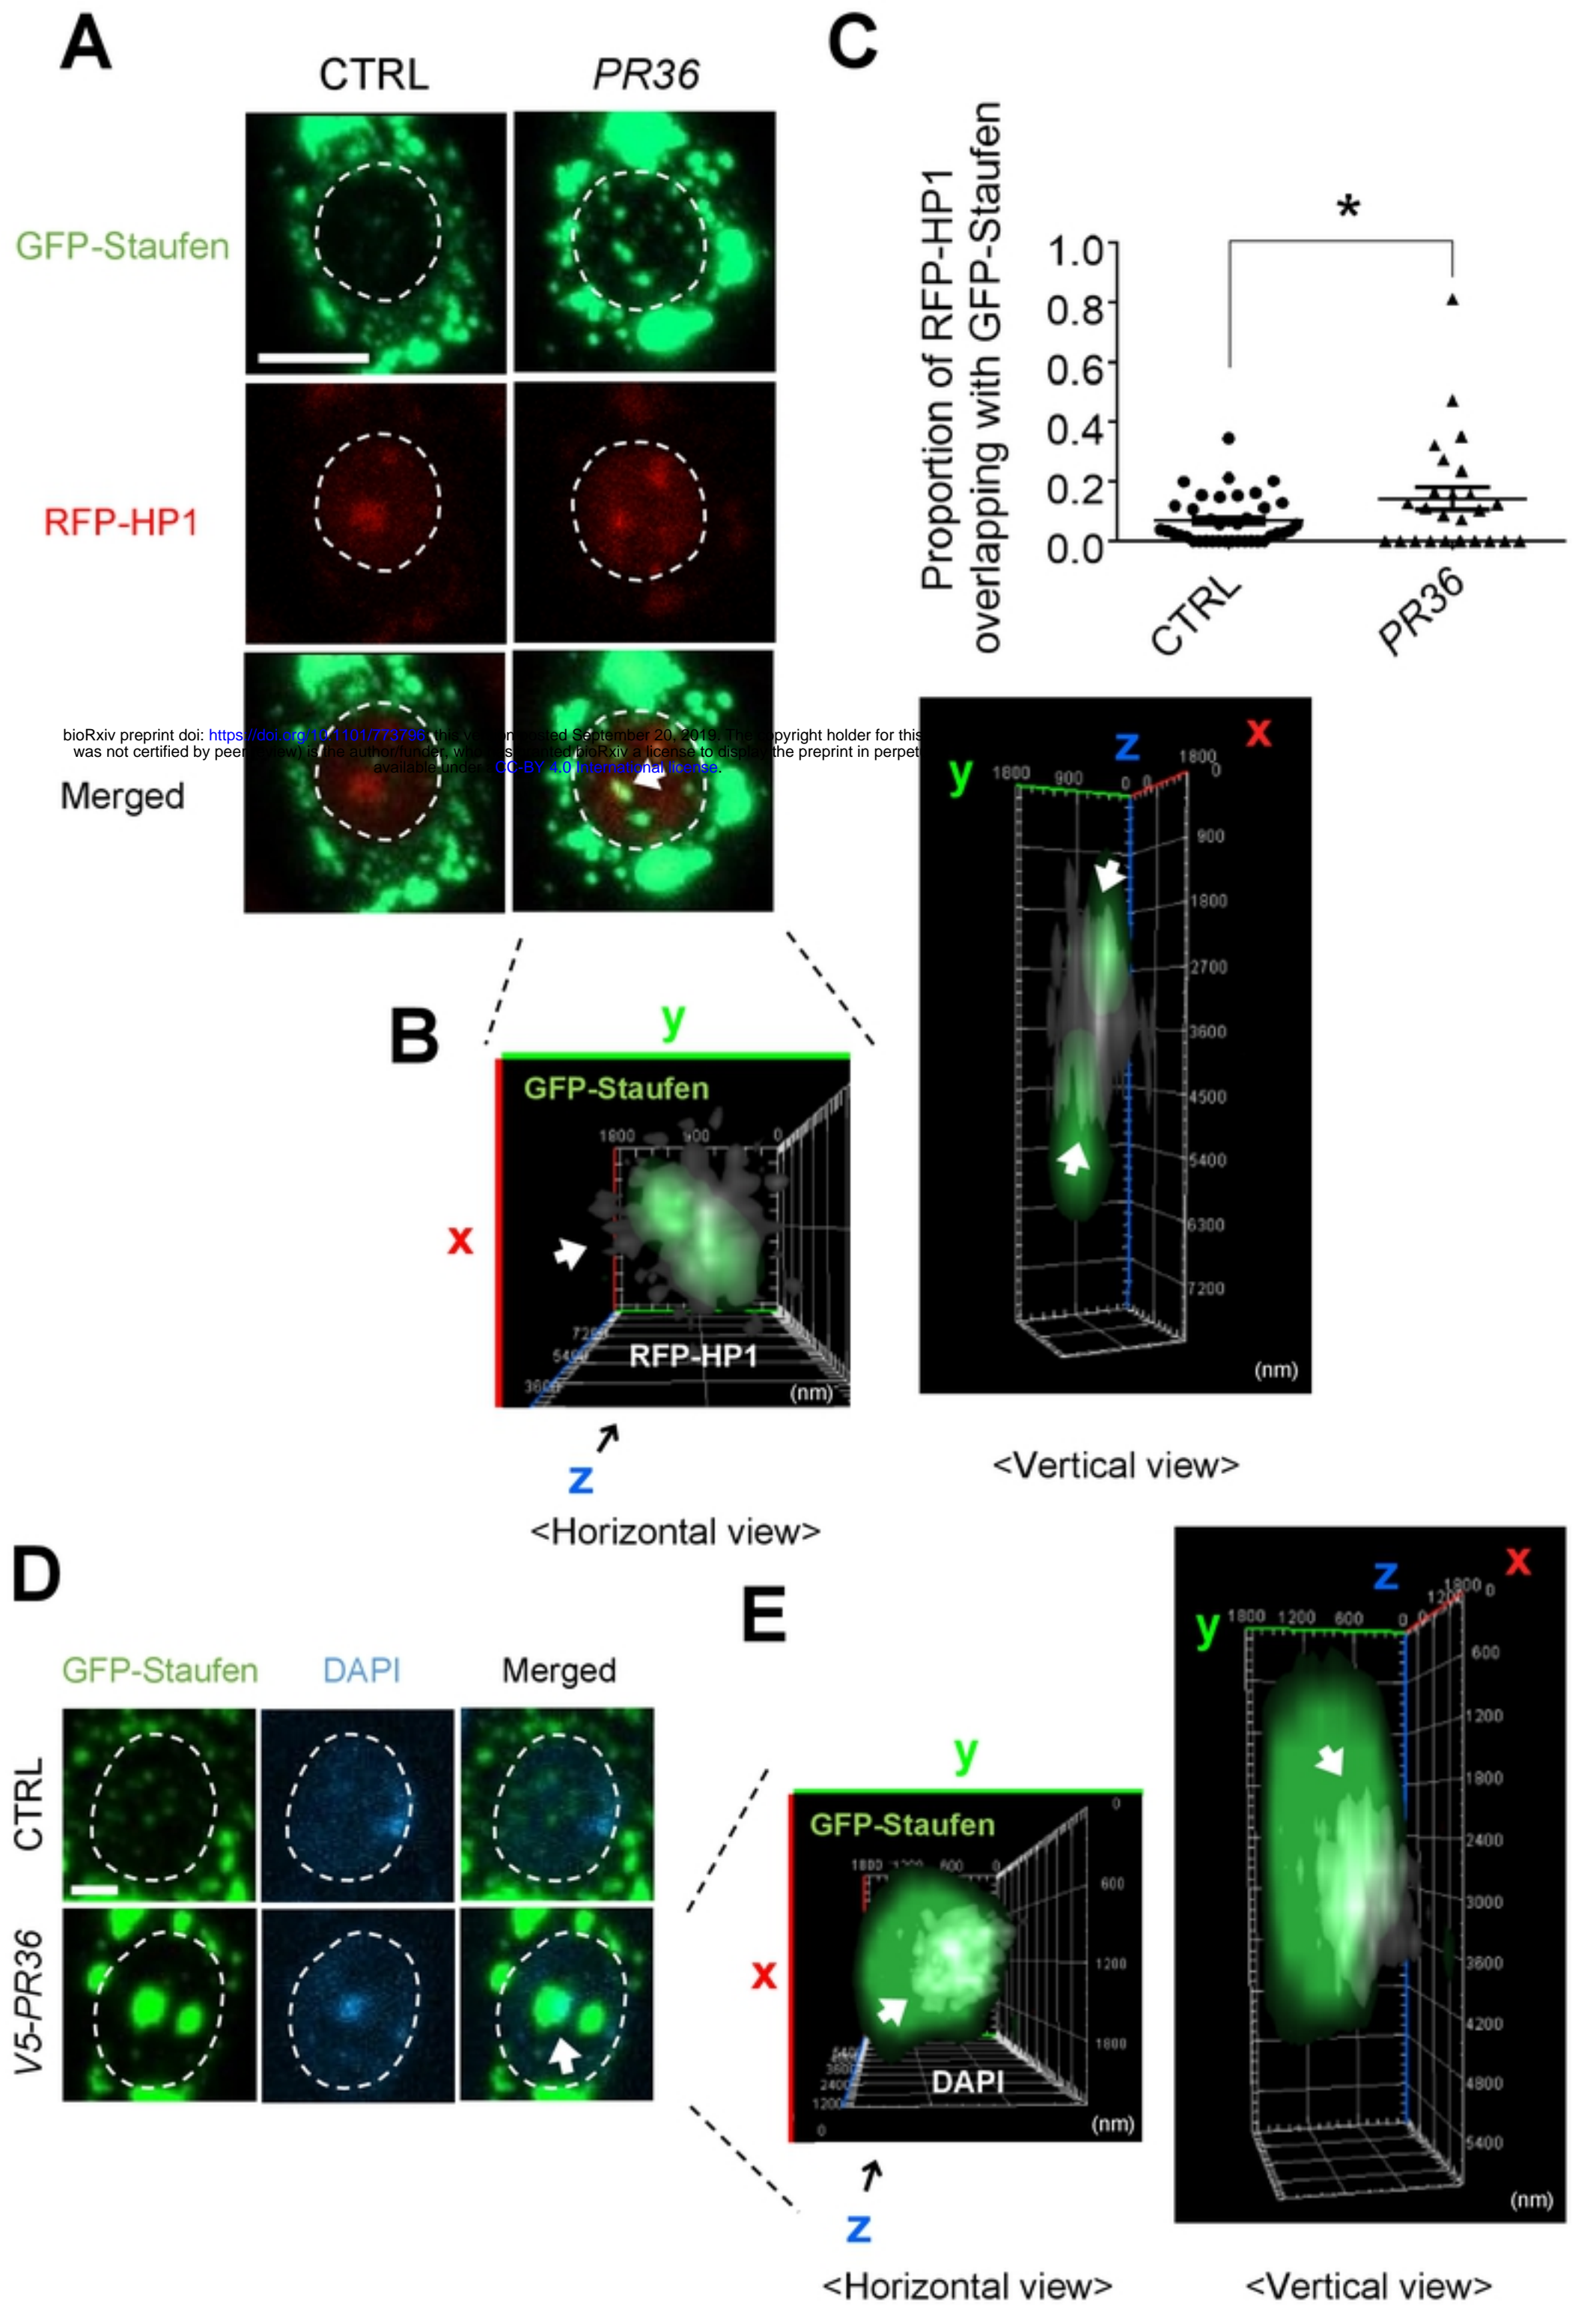

Fig 2.

**A**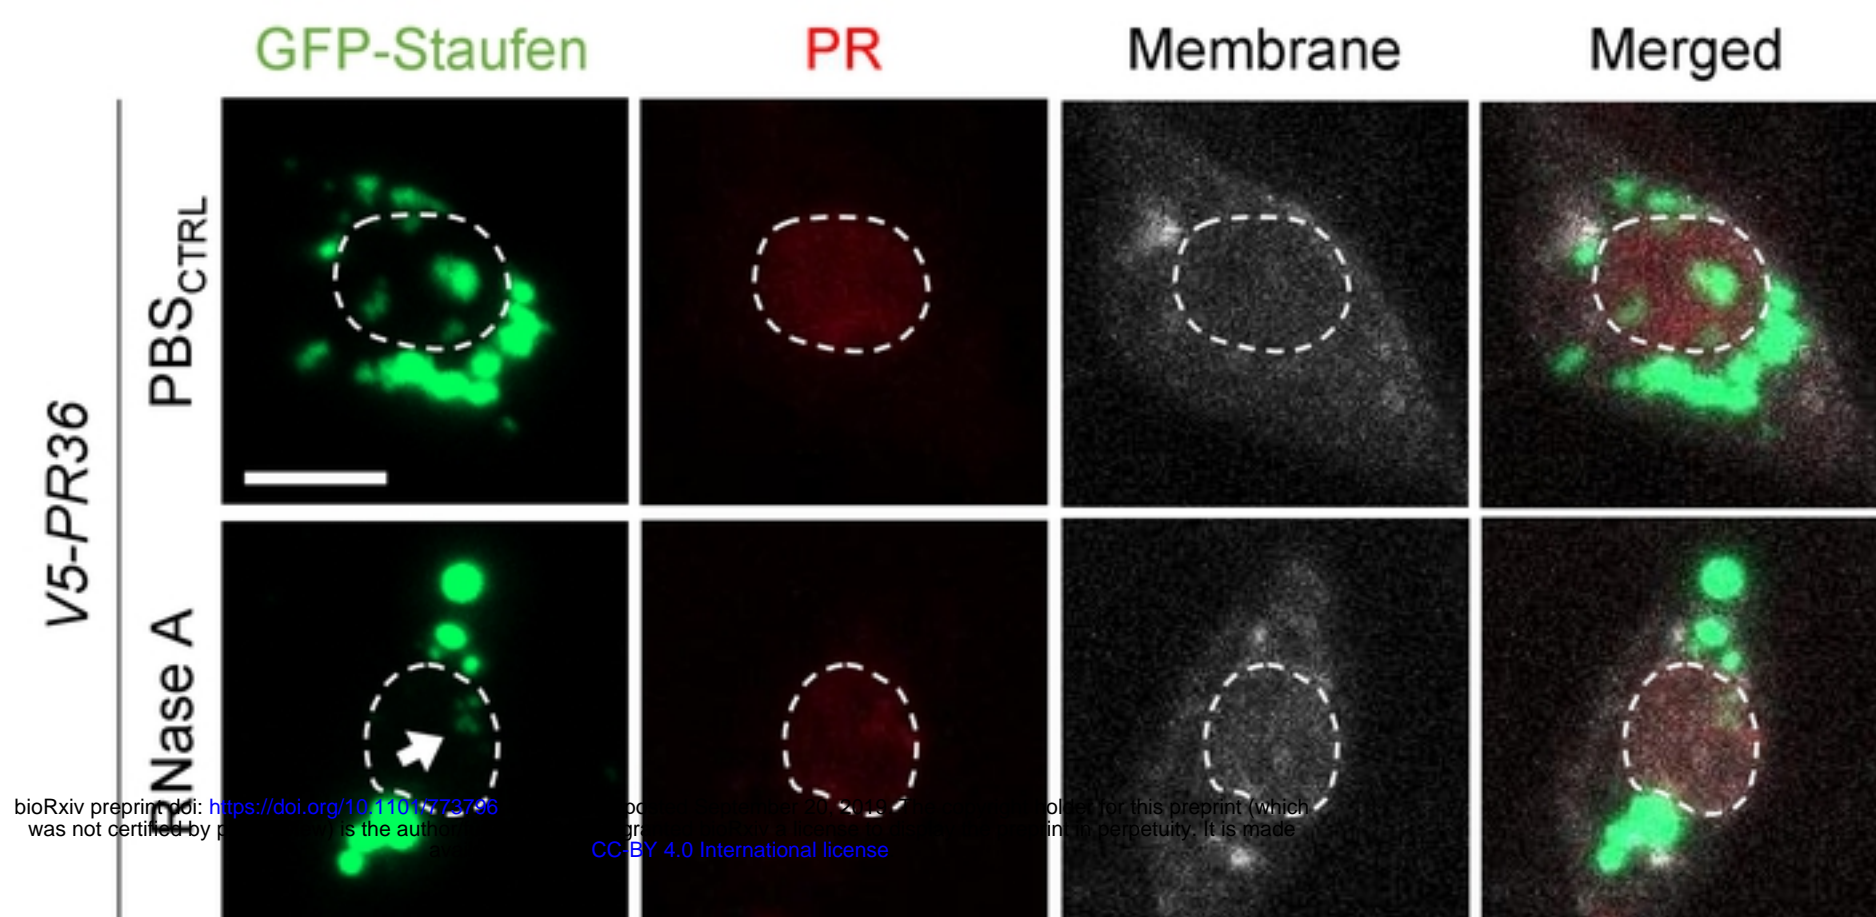**B**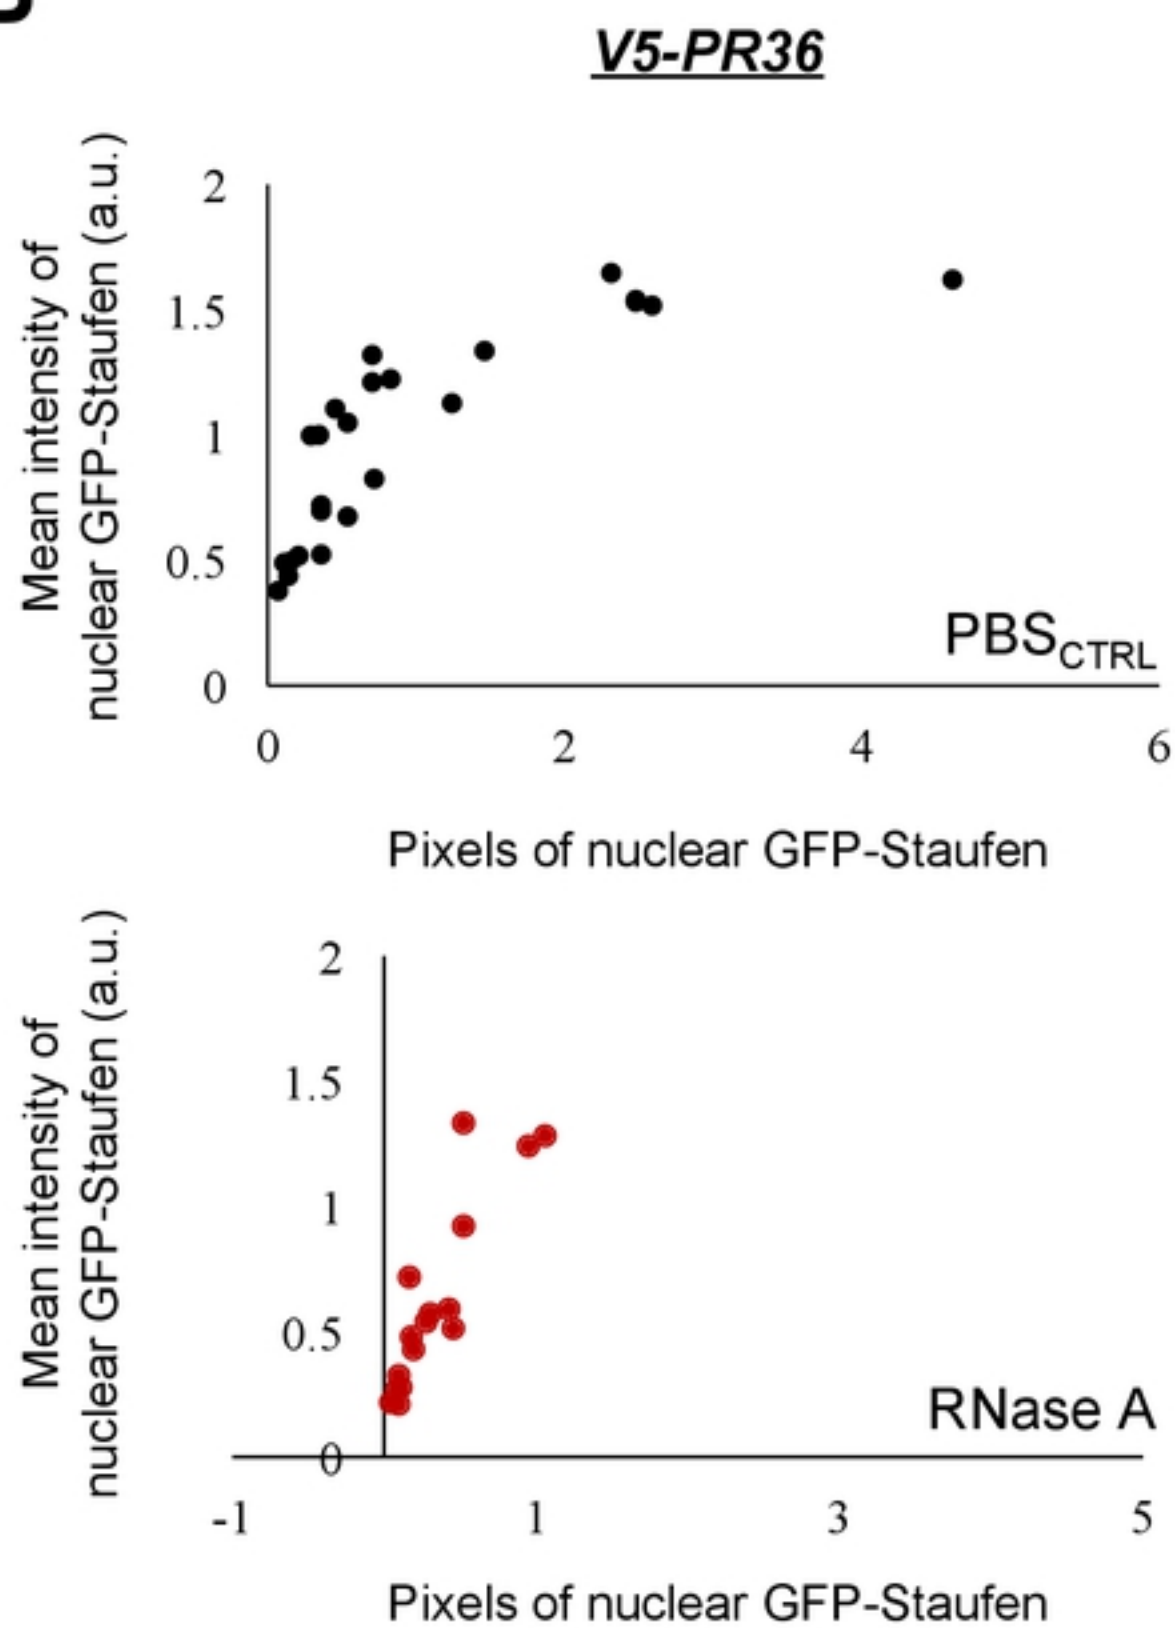**C**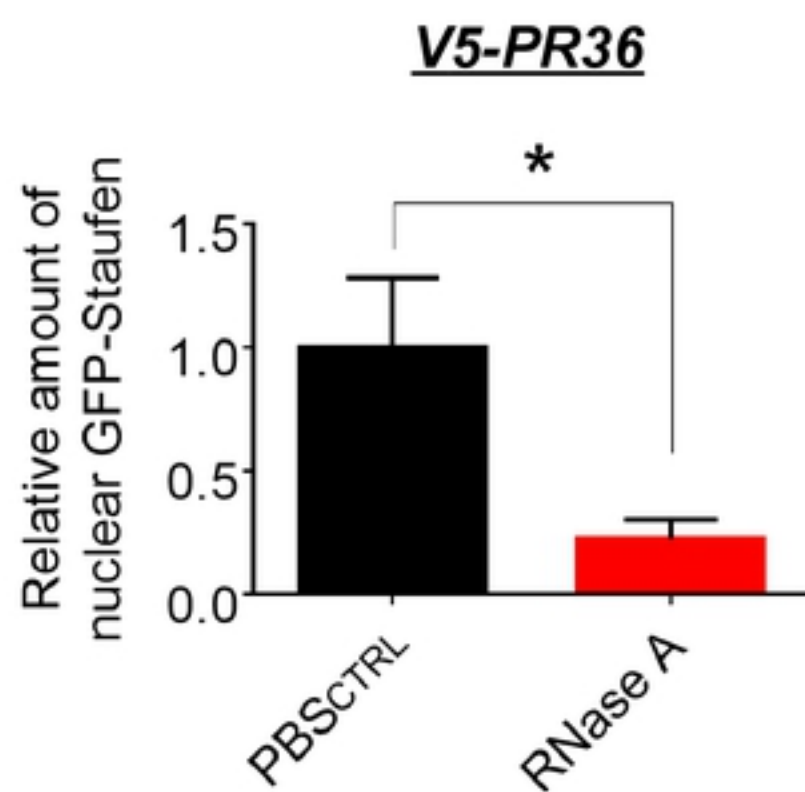**Fig 3.**

**A***V5-PR36*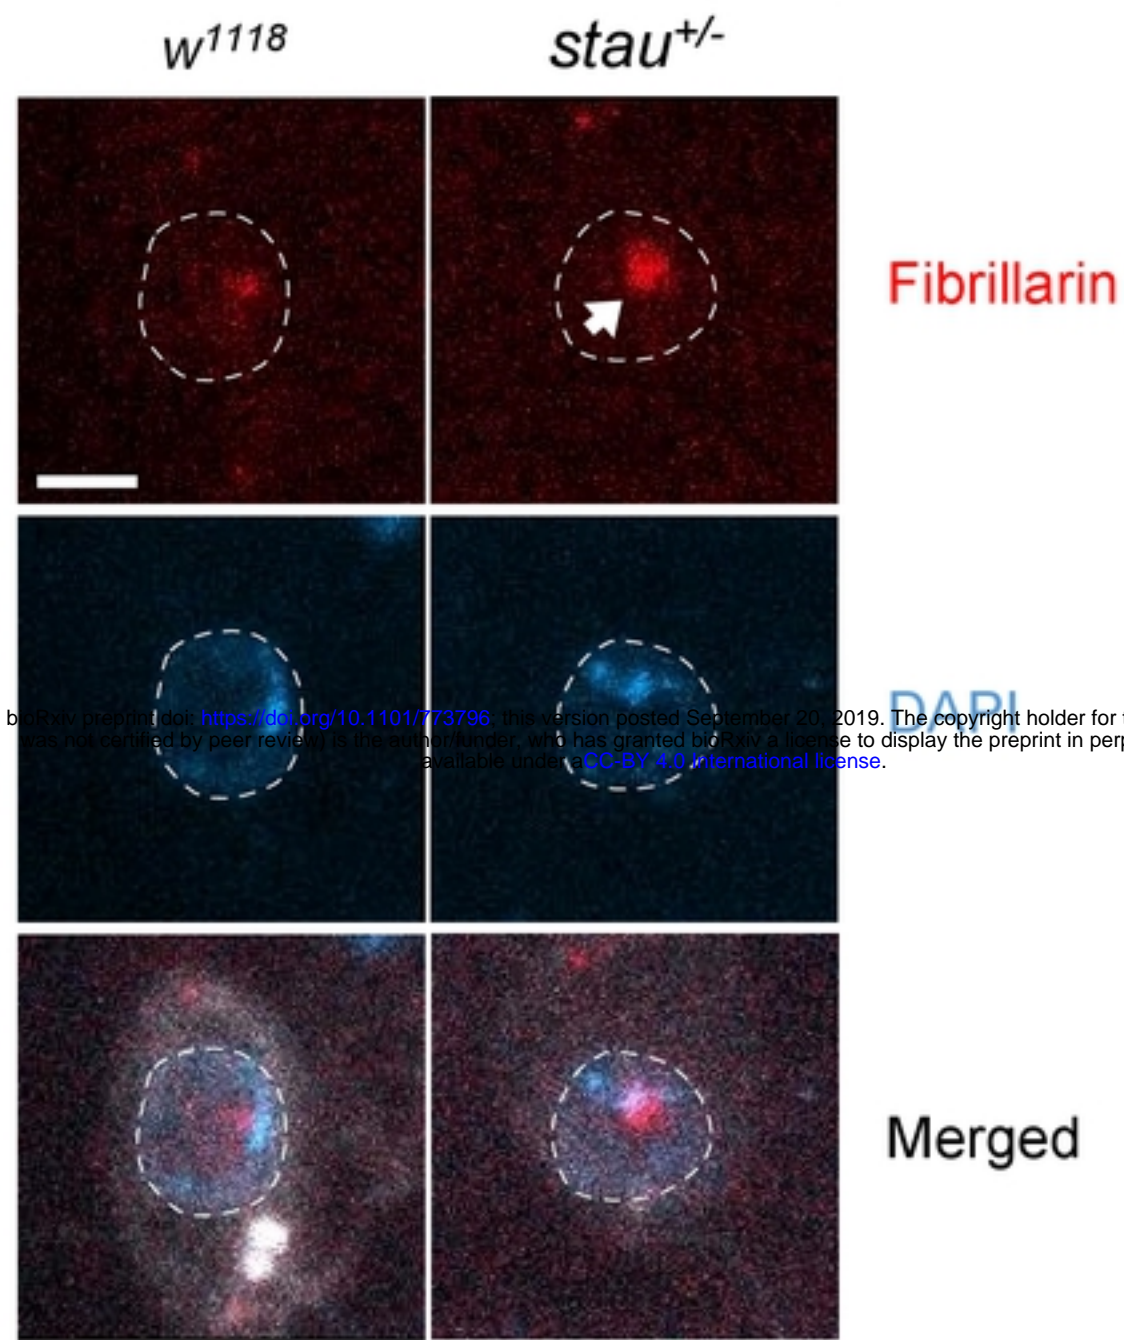**B**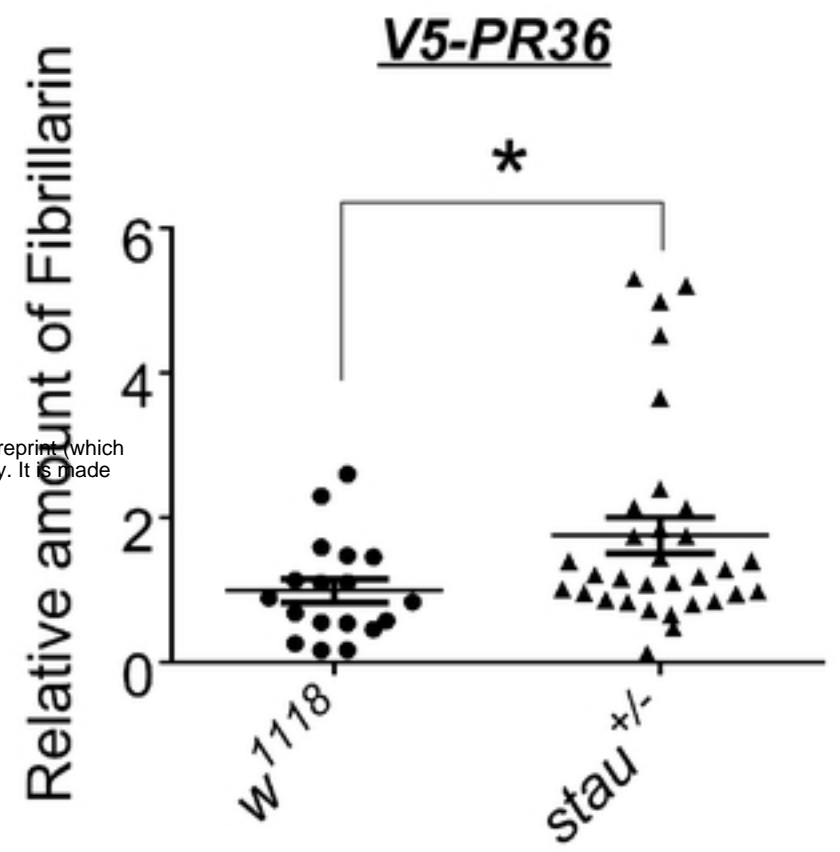**C**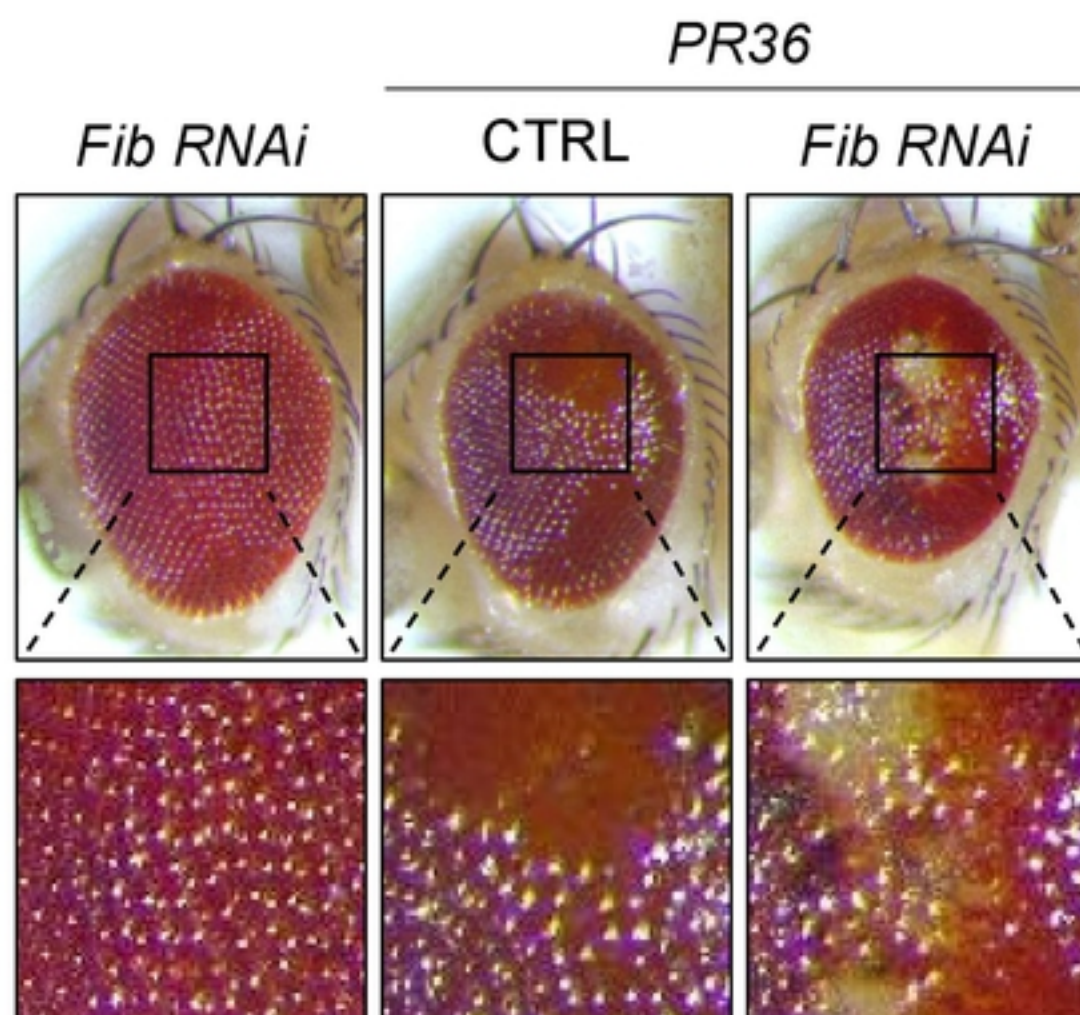

Fig 4.



**A****PR36**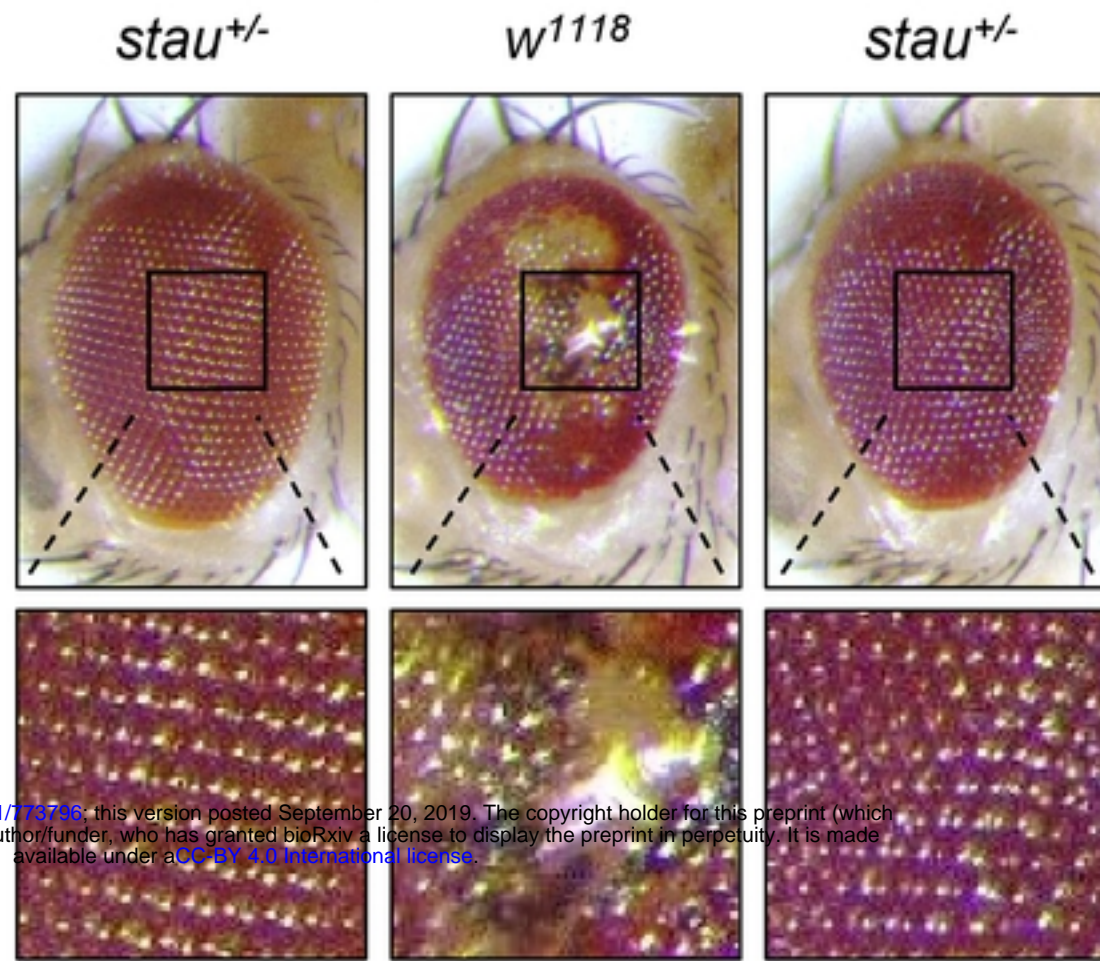

bioRxiv preprint doi: <https://doi.org/10.1101/173796>; this version posted September 20, 2019. The copyright holder for this preprint (which was not certified by peer review) is the author/funder, who has granted bioRxiv a license to display the preprint in perpetuity. It is made available under aCC-BY 4.0 International license.

**B**

|                                            | 1 <sup>st</sup> instar larvae | Pupae             | Adults            |
|--------------------------------------------|-------------------------------|-------------------|-------------------|
| <b><i>stau</i><sup>+/-</sup></b>           | 31                            | 28/31<br>(90.3 %) | 25/31<br>(80.6 %) |
|                                            | 28                            | 24/28<br>(85.7 %) | 20/28<br>(71.4 %) |
|                                            | 30                            | 25/30<br>(83.3 %) | 22/30<br>(73.3 %) |
| <b>V5-PR36</b>                             | 35                            | 11/35<br>(31.4 %) | 2/35<br>(5.71 %)  |
|                                            | 26                            | 14/26<br>(53.8 %) | 5/26<br>(19.2 %)  |
|                                            | 55                            | 24/55<br>(43.6 %) | 11/55<br>(20.0 %) |
| <b><i>stau</i><sup>+/-</sup> + V5-PR36</b> | 22                            | 20/22<br>(90.9 %) | 17/22<br>(77.3 %) |
|                                            | 10                            | 6/10<br>(60.0 %)  | 4/10<br>(40.0 %)  |
|                                            | 56                            | 38/56<br>(67.9 %) | 30/56<br>(53.6 %) |

**C**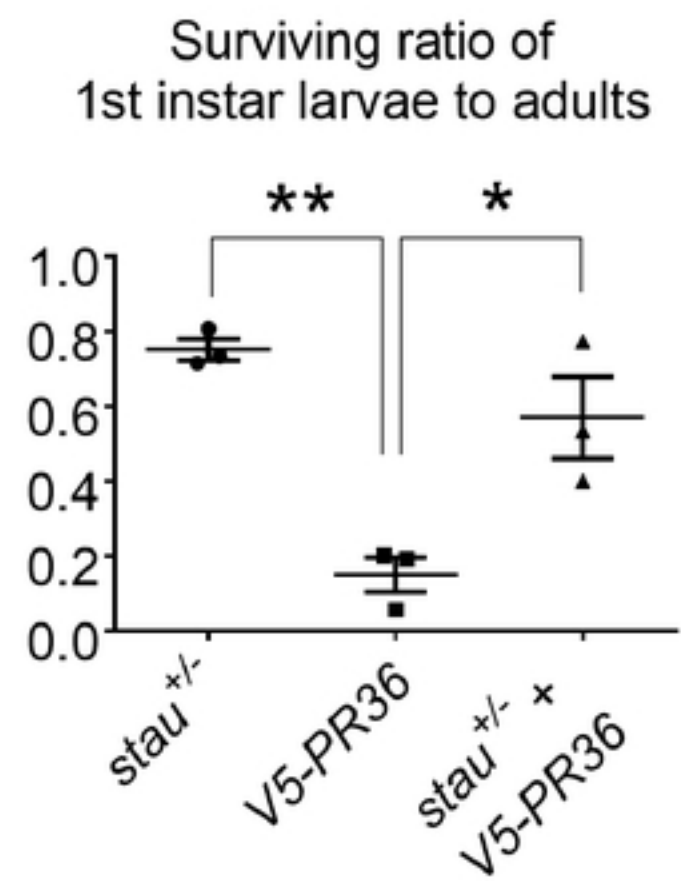**Fig 5.**
